# Supplementary material for: Rational design of reversibly photochromic molecules with aggregation-induced emission by introducing photoactive thienyl and benzothienyl groups
Source: Royal Society of Chemistry journal article supplement (doi:10.1039/d0tc02297g), 2020-01-01
Supplement: d0tc02297g1.pdf [file d0tc02297g1.pdf]

## Electronic Supplementary Information *for*

# Rational Design of Reversibly Photochromic Molecules with Aggregation-Induced Emission by Introducing Photoactive Thienyl and Benzothienyl Groups

Shasha Zhou,<sup>‡</sup> Sidan Guo,<sup>‡</sup> Weidong Liu,<sup>‡</sup> Qiaoying Yang, Huili Sun, Riqing Ding, Zhaosheng Qian and Hui Feng\*

<sup>‡</sup>These authors contributed to this work equally.

\*Corresponding author. E-mail: fenghui@zjnu.cn.

Key Laboratory of the Ministry of Education for Advanced Catalysis Materials, College of Chemistry and Life Sciences, Zhejiang Normal University, Jinhua 321004, People's Republic of China

### Table of Contents

#### 1. Experimental Section

#### 2. Computational Details

#### 3. Supplementary Schemes and Figures

**3.1 Scheme S1.** Synthesis routes of 2-TPVT, 3-TPVT, 2-TPVBT and 3-TPVBT.

**3.2 Figure S1.** Time-resolved PL decay curve of 2-TPVT solid.

**3.3 Figure S2.** PL spectra and images of solid forms of 2-TPVT (a), 3-TPVT (b), 2-TPVBT (c) and 3-TPVBT (d) before and after UV irradiation.

**3.4 Figure S3.** Images of solid form of 2-TPVT irradiated by UV light with different wavelengths ranging from 280 nm to 450 nm for 2 min.

**3.5 Figure S4.** Photochromic recycles of 3-TPVT (a), 2-TPVBT (b), and 3-TPVBT (c) in acetonitrile as a function of exposure to UV-light (365 nm) and visible-light respectively.

**3.6 Figure S5.** Time-dependent UV-vis absorption spectra of 2-TPVT in sucrose octaacetate film after different periods of UV-light irradiation from 0 to 270 s.

**3.7 Figure S6.** Time-dependent decoloration processes of the colored films of 3-TPVT (a), 2-TPVBT (b) and 3-TPVBT (c) under continuous white light irradiation.

**3.8 Figure S7.** Time-resolved PL spectra of 3-TPVT (a), 2-TPVBT (b), and 3-TPVBT (c) in film under continuous UV light irradiation.

**3.9 Figure S8.** Optimized structures of reactants, *E*-products and *Z*-products of cyclization reactions of TPE, 2-TPVT, 2-TPVBT and 3-TPVBT.

**3.10 Figure S9.** HOMOs and LUMOs of 3-TPVT, 2-TPVBT and 3-TPVBT calculated with B3LYP/6-311+G(d,p) level.

**3.11 Figure S10.** HOMOs and LUMOs of *E*-products of 3-TPVT, 2-TPVBT and 3-

TPVBT calculated with B3LYP/6-311+G(d,p) level.

#### 4. Supplementary Tables

**4.1 Table S1.** Optical properties of the four compounds in solution, film and solid

**4.2 Table S2.** Compositions of HOMOs and LUMOs of 3-TPVT, 3-TPVBT and 2-TPVBT Calculated at B3LYP/6-311+G(d,p) Level

**4.3 Table S3.** Compositions of HOMOs and LUMOs of *E*-products of 3-TPVT, 2-TPVBT and 3-TPVBT Calculated at B3LYP/6-311+G(d,p) Level

**4.4 Table S4.** Experimental and calculated absorption maxima of 3-TPVT, 2-TPVBT and 3-TPVBT and their products in acetonitrile

#### 5. Spectra of Compounds

**5.1** <sup>1</sup>H NMR spectrum of 2-(1,2,2-triphenylvinyl)thiophene (2-TPVT) in CDCl<sub>3</sub>

**5.2** <sup>13</sup>C NMR spectrum of 2-(1,2,2-triphenylvinyl)thiophene (2-TPVT) in CDCl<sub>3</sub>

**5.3** <sup>1</sup>H NMR spectrum of 3-(1,2,2-triphenylvinyl)thiophene (3-TPVT) in CDCl<sub>3</sub>

**5.4** <sup>13</sup>C NMR spectrum of 3-(1,2,2-triphenylvinyl)thiophene (3-TPVT) in CDCl<sub>3</sub>

**5.5** <sup>1</sup>H NMR spectrum of 2-(1,2,2-triphenylvinyl)benzo[*b*]thiophene (2-TPVBT) in CDCl<sub>3</sub>

**5.6** <sup>13</sup>C NMR spectrum of 2-(1,2,2-triphenylvinyl)benzo[*b*]thiophene (2-TPVBT) in CDCl<sub>3</sub>

**5.7** <sup>1</sup>H NMR spectrum of 3-(1,2,2-triphenylvinyl)benzo[*b*]thiophene (3-TPVBT) in CDCl<sub>3</sub>

**5.8** <sup>13</sup>C NMR spectrum of 3-(1,2,2-triphenylvinyl)benzo[*b*]thiophene (3-TPVBT) in CDCl<sub>3</sub>

**5.9** Mass spectrum of 2-(1,2,2-triphenylvinyl)thiophene (2-TPVT)

**5.10** Mass spectrum of 3-(1,2,2-triphenylvinyl)thiophene (3-TPVT)

**5.11** Mass spectrum of 2-(1,2,2-triphenylvinyl)benzo[*b*]thiophene (2-TPVBT)

**5.12** Mass spectrum of 3-(1,2,2-triphenylvinyl)benzo[*b*]thiophene (3-TPVBT)

#### 6. Cartesian Coordinates

#### 7. References

## 1. Experimental Section

**Synthesis of 2-(1,2,2-TriPhenylVinyl)Thiophene (2-TPVT).** 2-Thienylboronic acid (1.02 g, 9.0 mmol), 1-bromo-1,2,2-triphenylethylene (2.01 g, 6.0 mmol), and potassium carbonate (1.24 g, 9.0 mmol) were dissolved in a mixed solution of toluene (100 mL) and tetrahydrofuran (50 mL). The reaction solution was stirred at room temperature under nitrogen for 30 min, and then Pd (PPh<sub>3</sub>)<sub>4</sub> (50 mg, 0.043 mmol) was added. The resulting solution was heated at 80 °C for 16 h. After the reaction was completed, the mixture was poured into water and extracted 3 times with dichloromethane. The organic layer was dried over anhydrous sodium sulfate. After removing the solvent under reduced pressure, the crude product was purified by column chromatography on silica gel (petroleum ether) to obtain a white solid (1.47 g, 72.3%). Molecular formula: C<sub>24</sub>H<sub>18</sub>S. <sup>1</sup>H NMR (600 MHz, CDCl<sub>3</sub>): δ (ppm) 7.36 (t, J = 7 Hz, 4H), 7.30 (d, J = 8 Hz, 4H), 7.16 (m, J = 7 Hz, 4H), 7.05 (m, J = 7 Hz, 4H), 6.94 (m, J = 7 Hz, 2H). <sup>13</sup>C NMR (150 MHz, CDCl<sub>3</sub>): δ (ppm) 143.78, 143.56, 141.08, 141.05, 131.28, 130.98, 130.87, 130.34, 130.31, 129.52, 128.21, 128.00, 127.95, 127.87, 127.70, 127.58, 127.00, 122.17. MS (EI) m/z: [M<sup>+</sup>], 338.1 (calcd. for C<sub>24</sub>H<sub>18</sub>S, 338.1).

**Synthesis of 3-(1,2,2-TriPhenylVinyl)Thiophene (3-TPVT).** 3-Thienylboronic acid (1.02 g, 9.0 mmol), 1-bromo-1,2,2-triphenylethylene (2.01 g, 6.0 mmol), and potassium carbonate (1.24 g, 9.0 mmol) were dissolved in a mixed solution of toluene (60 mL) and tetrahydrofuran (30 mL). The reaction solution was stirred at room temperature under nitrogen for 30 min, and then Pd (PPh<sub>3</sub>)<sub>4</sub> (50 mg, 0.043 mmol) was added. The resulting solution was heated at 80 °C for 18 h. After the reaction was completed, the mixture was poured into water and extracted 3 times with dichloromethane. The organic layer was dried over anhydrous sodium sulfate. After removing the solvent under reduced pressure, the crude product was purified by column chromatography on silica gel (petroleum ether) to obtain a white solid powder (1.43 g, 70.5%). <sup>1</sup>H NMR (600 MHz, CDCl<sub>3</sub>): δ (ppm) 7.18 (m, J = 7 Hz, 3H), 7.11 (m, J = 7 Hz, 5H), 7.08-7.05 (m, J = 7 Hz, 5H), 6.99 (m, J = 7 Hz, 3H), 6.73 (d, J = 7 Hz, 1H), 6.56 (d, J = 7 Hz, 1H). <sup>13</sup>C NMR (150 MHz, CDCl<sub>3</sub>): δ (ppm) 144.12, 144.02, 143.43, 143.42, 140.66, 135.47, 131.21, 131.15, 130.83, 130.06, 127.94, 127.65, 127.58, 126.73, 126.57, 126.32, 125.98, 123.65. MS (EI) m/z: [M<sup>+</sup>], 338.1 (calcd.

for C<sub>24</sub>H<sub>18</sub>S, 338.1).

**Synthesis of 2-(1,2,2-TriphenylVinyl)Benzo[*b*]Thiophene (2-TPVBT).** 2-Benzothierylboronic acid (1.02 g, 6.0 mmol), 1-bromo-1,2,2-triphenylethylene (1.34 g, 4.0 mmol), and potassium carbonate (0.83 g, 6.0 mmol) were dissolved in a mixed solution of toluene (60 mL) and tetrahydrofuran (30 mL). The reaction solution was stirred at room temperature under nitrogen for 30 min, and then Pd (PPh<sub>3</sub>)<sub>4</sub> (50 mg, 0.043 mmol) was added and the solution heated at 80 °C for 18 h. After the reaction was completed, the mixture was poured into water and extracted 3 times with dichloromethane. The organic layer was dried over anhydrous sodium sulfate. After removing the solvent under reduced pressure, the crude product was purified by column chromatography on silica gel (petroleum ether) to obtain a white solid (0.87 g, 56.1%). Molecular formula: C<sub>28</sub>H<sub>20</sub>S. <sup>1</sup>H NMR (600 MHz, CDCl<sub>3</sub>): δ (ppm) 7.52 (d, J = 8 Hz, 1H), 7.43 (d, J = 7 Hz, 1H), 7.19 (m, J = 7 Hz, 2H), 7.16 (m, J = 7 Hz, 4H), 7.12 (m, J = 7 Hz, 3H), 7.08 (m, J = 7 Hz, 3H), 7.00 (m, J = 7 Hz, 3H), 6.92 (m, J = 7 Hz, 2H), 6.75 (s, 1H). <sup>13</sup>C NMR (150 MHz, CDCl<sub>3</sub>): δ (ppm) 146.69, 143.07, 143.02, 143.00, 142.91, 140.73, 139.25, 134.09, 131.33, 131.05, 130.98, 128.26, 127.79, 127.62, 127.47, 127.07, 126.65, 126.41, 124.11, 123.93, 123.45, 121.92. MS (EI) m/z: [M<sup>+</sup>], 388.2 (calcd. for C<sub>28</sub>H<sub>20</sub>S, 388.1).

**Synthesis of 3-(1,2,2-TriPhenylVinyl)Benzo[*b*]Thiophene (3-TPVBT).** 1-Bromo-1,2,2-triphenylethylene (1.34g, 4.0 mmol), 2-benzothierylboronic acid (1.02 g, 6.0 mmol), and potassium carbonate (0.83 g, 6.0 mmol) were dissolved in a mixed solution of toluene (60 mL) and tetrahydrofuran (30 mL). The reaction solution was stirred at room temperature under nitrogen for 30 min, then Pd (PPh<sub>3</sub>)<sub>4</sub> (50 mg, 0.043 mmol) was added and the solution heated at 80 °C for 18 h. After the reaction was completed, the mixture was poured into water and extracted 3 times with dichloromethane. The organic layer was dried over anhydrous sodium sulfate. After removing the solvent under reduced pressure, the crude product was purified by column chromatography on silica gel (petroleum ether) to obtain a white solid powder (0.91 g, 58.5%). Molecular formula: C<sub>28</sub>H<sub>20</sub>S. <sup>1</sup>H NMR (600 MHz, CDCl<sub>3</sub>): δ (ppm) 7.69 (t, J = 7 Hz, 1H), 7.30 (m, J = 7 Hz, 1H), 7.15 (t, J = 7 Hz, 1H), 7.09-7.07 (m, J = 7 Hz, 5H), 7.04 (m, J = 7 Hz, 2H), 7.02 (m, J = 7 Hz, 4H), 6.95 (m, J = 7 Hz, 6H). <sup>13</sup>C NMR (150 MHz, CDCl<sub>3</sub>): δ (ppm) 143.86, 143.54, 142.99, 141.99, 139.92, 138.92, 138.73, 134.56, 131.49, 131.46, 130.58, 130.56, 130.14, 130.11, 127.80,

127.63, 127.09, 126.75, 126.65, 123.86, 123.50, 122.51. MS (EI) m/z: [M<sup>+</sup>], 388.1 (calcd. for C<sub>28</sub>H<sub>20</sub>S, 388.1).

**Characterization of UV-Visible and Fluorescence Properties of All Samples.**

UV-vis absorption spectra were recorded using an Agilent Cary 5000 UV-Vis-NIR spectrophotometer. Steady PL spectra of all samples were performed on an Edinburgh Instruments model FLS980 fluorescence spectrophotometer equipped with a xenon arc lamp using a front face sample holder. Time-resolved fluorescence measurements were conducted with EPL-series lasers. The absolute PL quantum yields of all samples were determined using an integrating sphere equipped in FLS980 spectrophotometer for at least three times.

## 2. Computational Details

All the calculations were performed with density functional theory (DFT) and time-dependent density functional theory (TDDFT) implemented in Gaussian 09 program package.<sup>1</sup> The ground state equilibrium geometries and the normal modes of vibration of the single-molecules of TPE, 3-TPVT, 2-TPVT, 3-TPVBT and 2-TPVBT were computed using density functional theory (DFT) with the hybrid B3LYP functional at 6-311+G(d,p) level.<sup>2</sup> NBO analysis of all the four compounds and their photocyclized products were performed with the same basis set to the optimization. Excitation energies and absorption maxima of all the four molecules and their *E*-products were calculated using PBE0 functional with 6-311+G(d,p) level based on the optimized structure in acetonitrile with SCRF.<sup>3</sup>

### 3. Supplementary Schemes and Figures

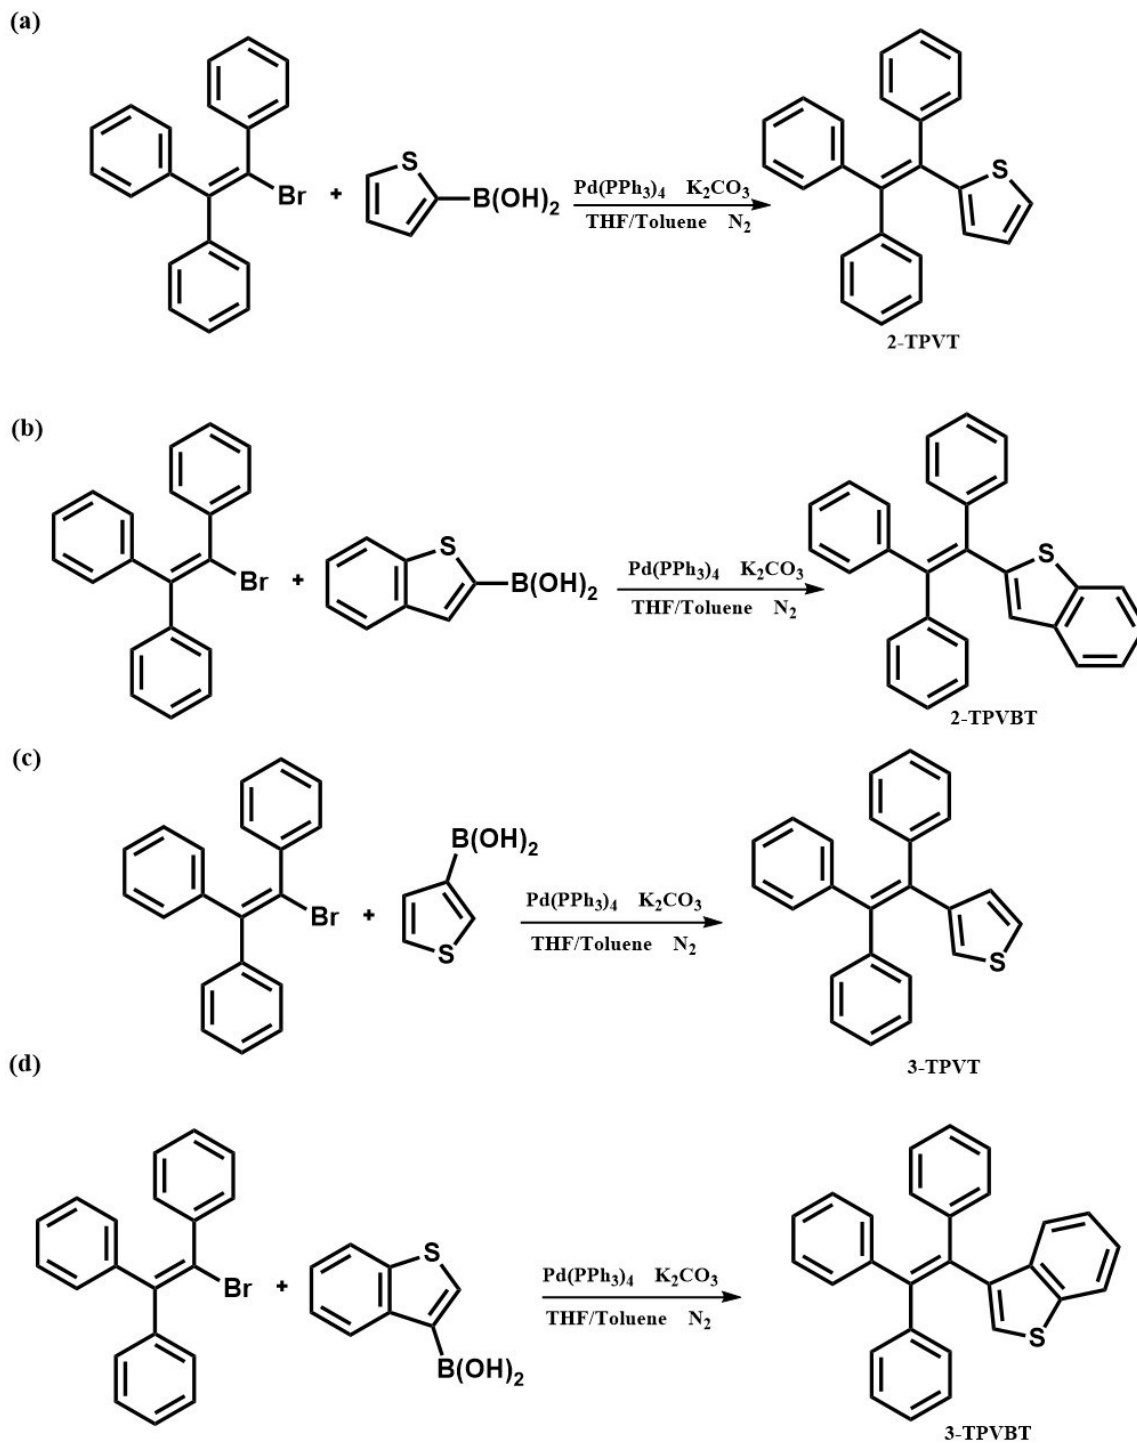

**Scheme S1.** Synthesis routes of 2-TPVT, 3-TPVT, 2-TPVBT and 3-TPVBT.

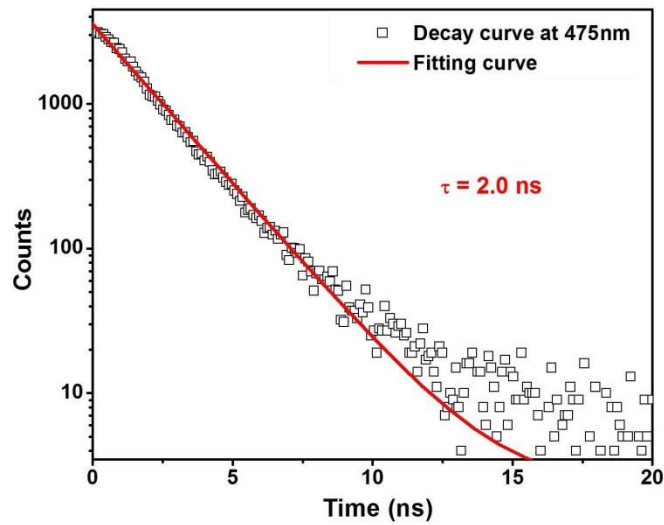

Figure S1. Time-resolved PL decay curve of 2-TPVT solid.

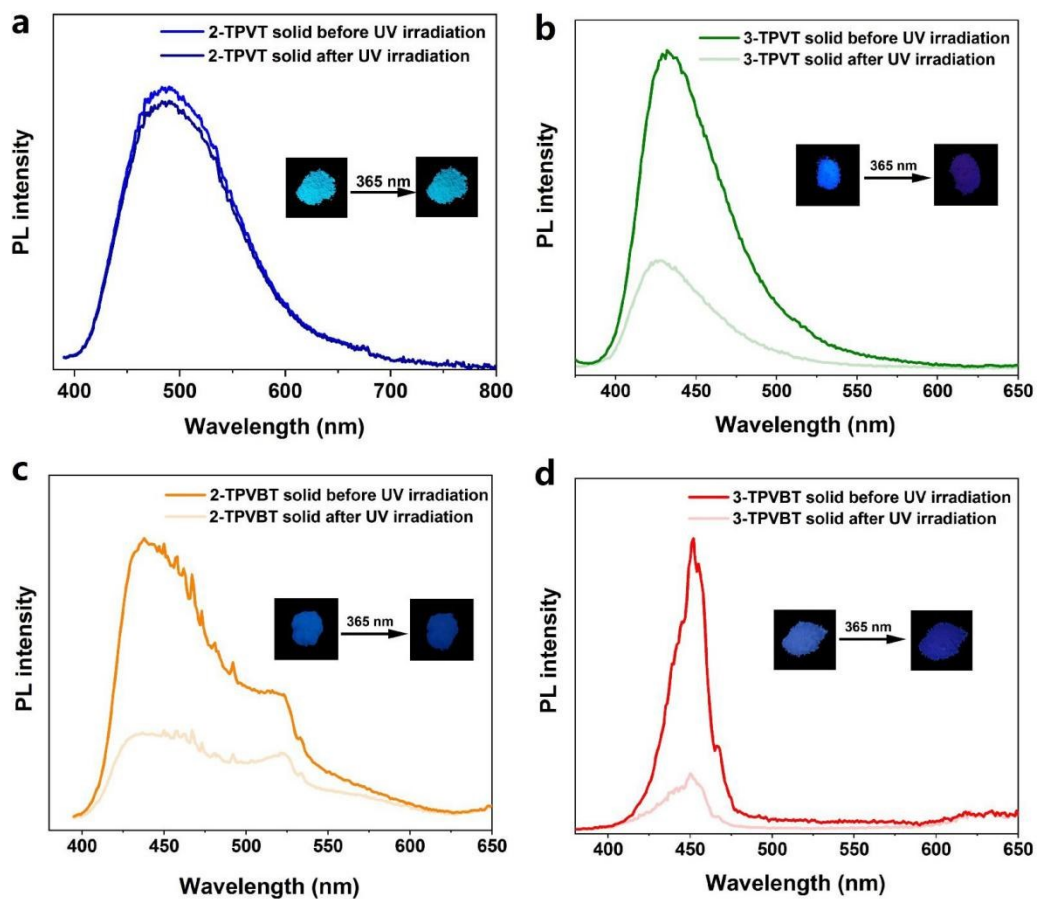

Figure S2. PL spectra and images of solid forms of 2-TPVT (a), 3-TPVT (b), 2-TPVBT (c) and 3-TPVBT (d) before and after UV irradiation.



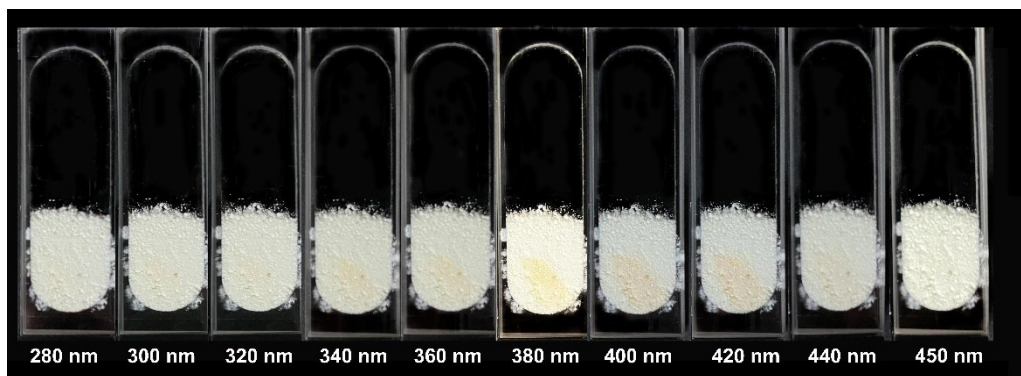

**Figure S3.** Images of solid form of 2-TPVT irradiated by UV light with different wavelengths ranging from 280 nm to 450 nm for 2 min.

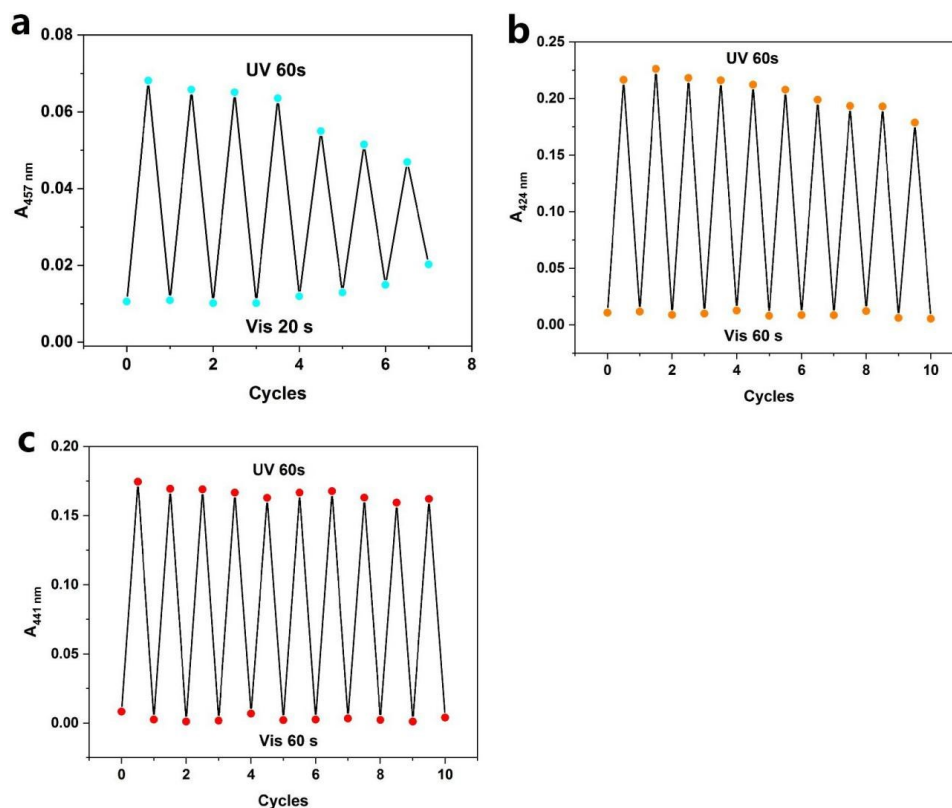

**Figure S4.** Photochromic cycles of 3-TPVT (a), 2-TPVBT (b), and 3-TPVBT (c) in acetonitrile as a function of exposure to UV-light (365 nm) and visible-light respectively.

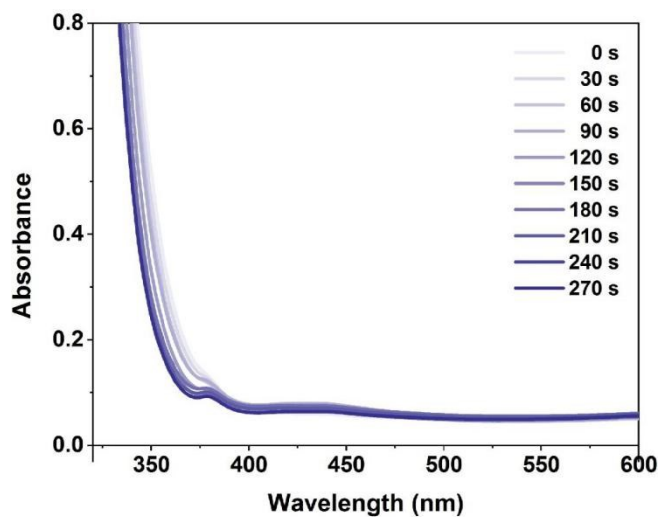

**Figure S5.** Time-dependent UV-vis absorption spectra of 2-TPVT in sucrose octaacetate film after different periods of UV-light irradiation from 0 to 270 s.

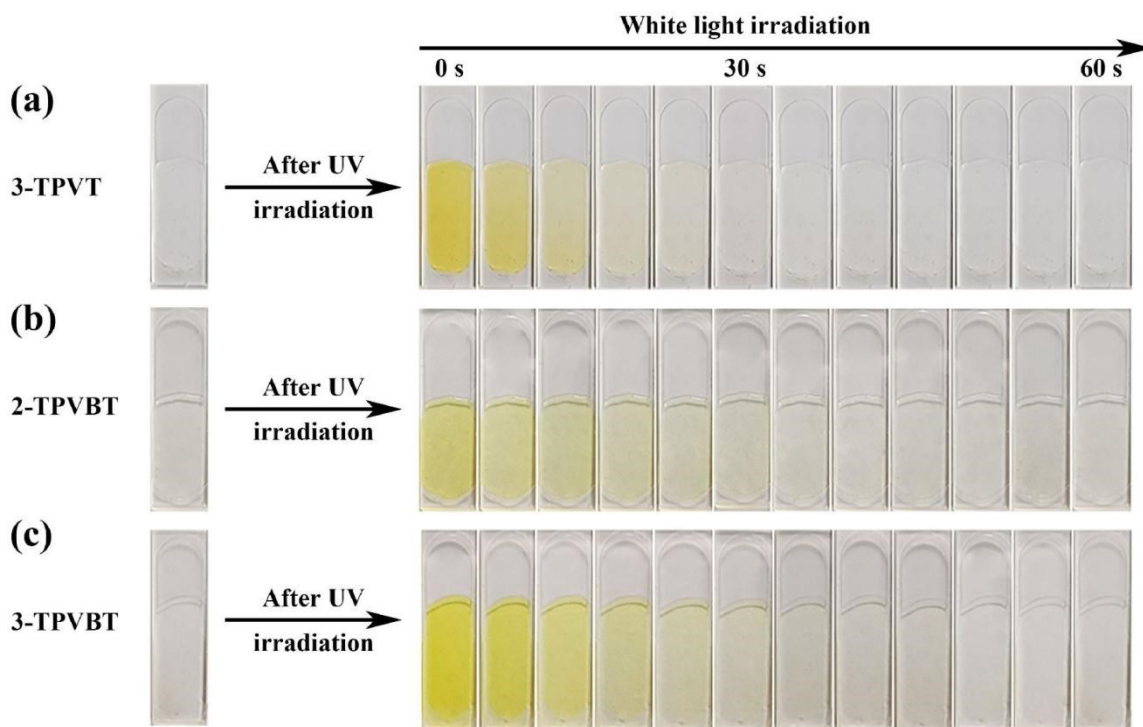

**Figure S6.** Time-dependent decoloration processes of the colored films of 3-TPVT (a), 2-TPVBT (b) and 3-TPVBT (c) under continuous white light irradiation.

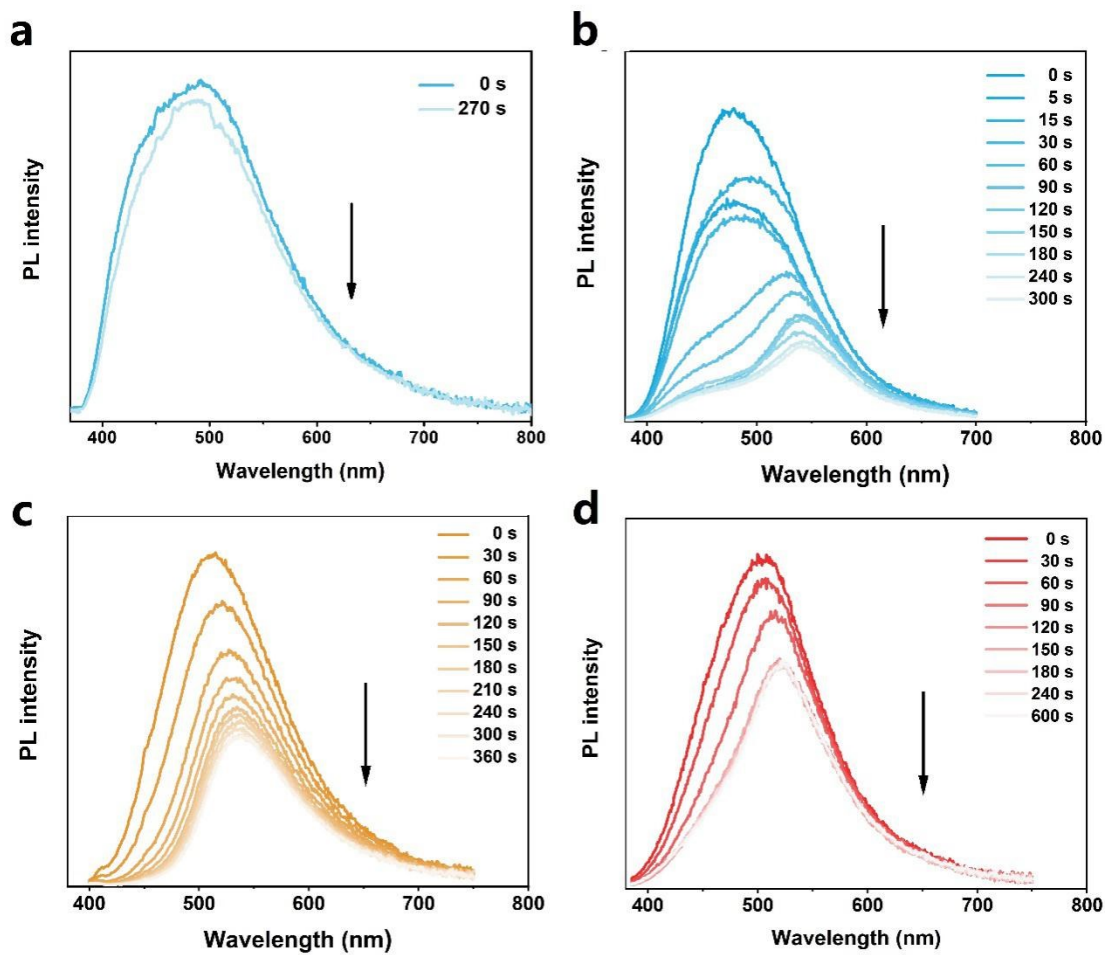

**Figure S7.** Time-resolved PL spectra of 3-TPVT (a), 2-TPVBT (b), and 3-TPVBT (c) in film under continuous UV light irradiation.

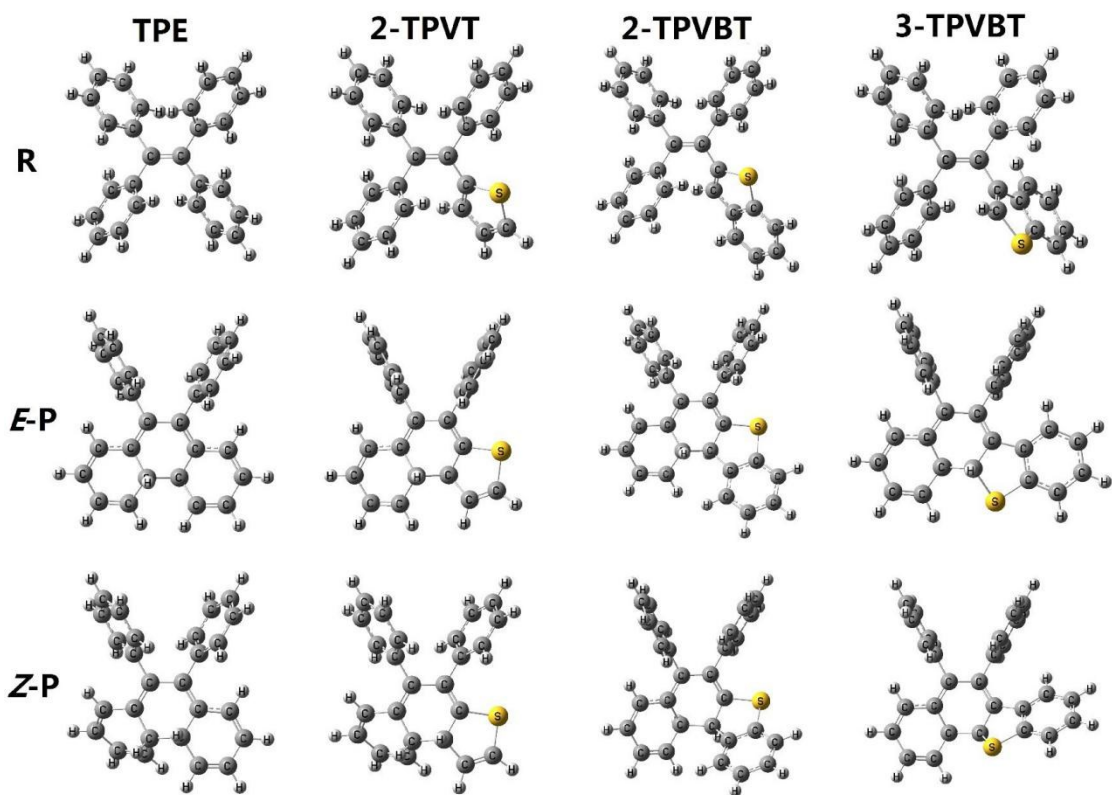

**Figure S8.** Optimized structures of reactants, *E*-products and *Z*-products of cyclization reactions of TPE, 2-TPVT, 2-TPVBT and 3-TPVBT.

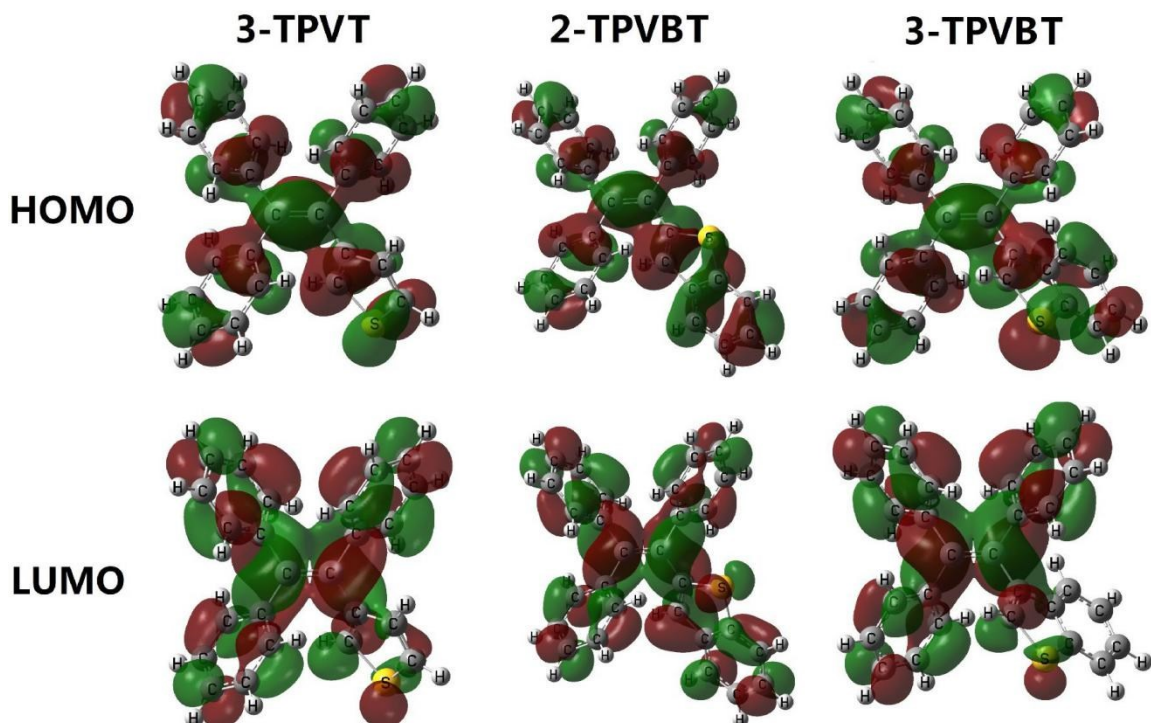

**Figure S9.** HOMOs and LUMOs of 3-TPVT, 2-TPVBT and 3-TPVBT calculated with B3LYP/6-311+G(d,p) level.

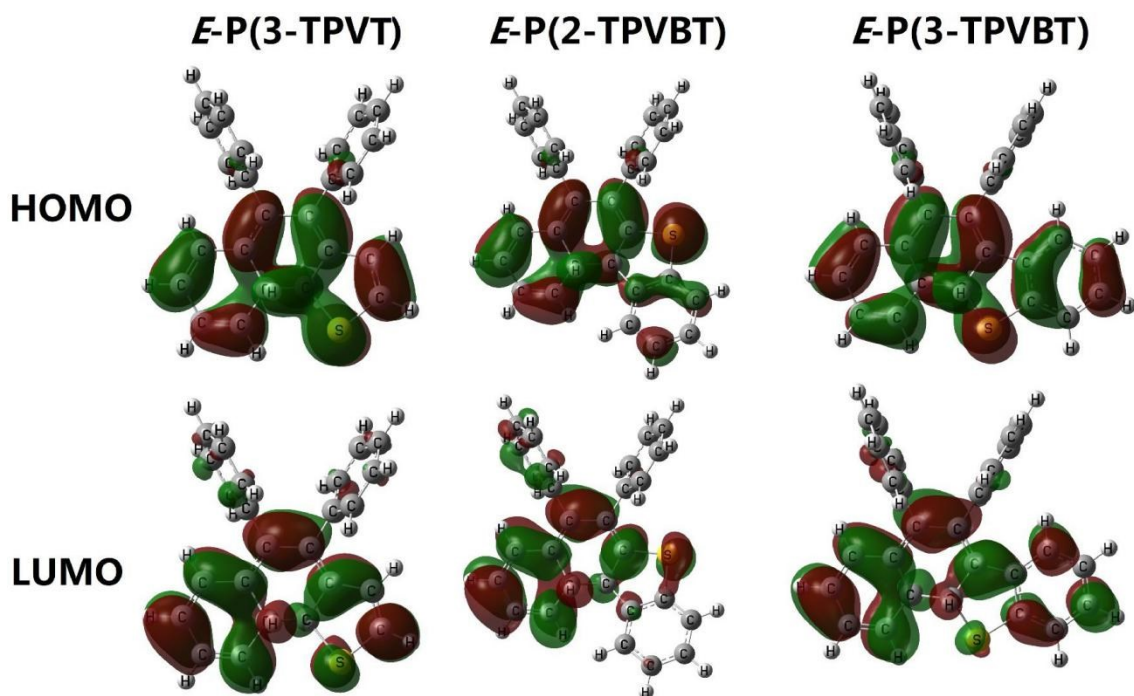

**Figure S10.** HOMOs and LUMOs of *E*-products of 3-TPVT, 2-TPVBT and 3-TPVBT calculated with B3LYP/6-311+G(d,p) level.

#### 4. Supplementary Tables

**Table S1.** Optical properties of the four compounds in solution, film and solid.

|                | Solution                 |                          | Film                     |                          |                          |                          | Solid                    |                          |                          |
|----------------|--------------------------|--------------------------|--------------------------|--------------------------|--------------------------|--------------------------|--------------------------|--------------------------|--------------------------|
|                | $\lambda_{ab}^a$<br>(nm) | $\lambda_{ab}^b$<br>(nm) | $\lambda_{ab}^a$<br>(nm) | $\lambda_{ab}^b$<br>(nm) | $\lambda_{fl}^a$<br>(nm) | $\lambda_{fl}^b$<br>(nm) | $\lambda_{ab}^a$<br>(nm) | $\lambda_{ab}^b$<br>(nm) | $\lambda_{fl}^a$<br>(nm) |
| <b>2-TPVT</b>  | 282                      | -                        | 342                      | -                        | 495                      | 495                      | 352                      | 475                      | 485                      |
| <b>3-TPVT</b>  | 302                      | 456                      | 385                      | 460                      | 480                      | 540                      | 385                      | 508                      | 432                      |
| <b>2-TPVBT</b> | 322                      | 424                      | 383                      | 430                      | 510                      | 535                      | 383                      | 458                      | 435                      |
| <b>3-TPVBT</b> | 311                      | 440                      | 372                      | 442                      | 510                      | 525                      | 372                      | 503                      | 450                      |

$\lambda_{ab}$  and  $\lambda_{fl}$  represents absorption maximum and fluorescence maximum respectively.

<sup>a</sup> The open form. <sup>b</sup> The closed form.

**Table S2.** Compositions of HOMOs and LUMOs of 3-TPVT, 3-TPVBT and 2-TPVBT Calculated at B3LYP/6-311+G(d,p) Level

| Group              | Contribution to HOMO (%) | Contribution to LUMO (%) |
|--------------------|--------------------------|--------------------------|
| <b>3-TPVT</b>      |                          |                          |
| Vinyl group        | 27.3                     | 33.1                     |
| Phenyl groups      | 48.9                     | 50.4                     |
| Thienyl group      | 23.0                     | 12.0                     |
| <b>2-TPVBT</b>     |                          |                          |
| Vinyl group        | 21.3                     | 31.3                     |
| Phenyl groups      | 38.1                     | 37.6                     |
| Benzothienyl group | 39.8                     | 27.5                     |
| <b>3-TPVBT</b>     |                          |                          |
| Vinyl group        | 21.1                     | 33.2                     |
| Phenyl groups      | 40.5                     | 52.6                     |
| Benzothienyl group | 37.6                     | 9.7                      |

**Table S3.** Compositions of HOMOs and LUMOs of *E*-products of 3-TPVT, 2-TPVBT and 3-TPVBT Calculated at B3LYP/6-311+G(d,p) Level

| Group                              | Contribution to HOMO (%) | Contribution to LUMO (%) |
|------------------------------------|--------------------------|--------------------------|
| <b><i>E</i>-Product of 3-TPVT</b>  |                          |                          |
| Phenyl groups                      | 3.6                      | 4.0                      |
| Dihydronaphththienyl group         | 94.9                     | 92.6                     |
| <b><i>E</i>-Product of 2-TPVBT</b> |                          |                          |
| Phenyl groups                      | 2.1                      | 5.4                      |
| Dihydronaphthbenzothienyl group    | 96.3                     | 90.9                     |
| <b><i>E</i>-Product of 3-TPVBT</b> |                          |                          |
| Phenyl groups                      | 1.4                      | 3.4                      |
| Dihydronaphthbenzothienyl group    | 97.1                     | 93.7                     |

**Table S4.** Experimental and calculated absorption maxima of 3-TPVT, 2-TPVBT and 3-TPVBT and their products in acetonitrile.

|                        | $\lambda_{ab}^{exp}$ (nm) | $\lambda_{ab}^{cal}$ (nm) | $f_{cal}$ |
|------------------------|---------------------------|---------------------------|-----------|
| 3-TPVT                 | 302                       | 336                       | 0.2637    |
| 2-TPVBT                | 322                       | 381                       | 0.1946    |
| 3-TPVBT                | 311                       | 386                       | 0.1043    |
| <i>E</i> -P of 3-TPVT  | 456                       | 500                       | 0.1238    |
| <i>E</i> -P of 2-TPVBT | 424                       | 442                       | 0.1633    |
| <i>E</i> -P of 3-TPVBT | 440                       | 485                       | 0.1784    |

## 5. NMR and MS Spectra of Compounds

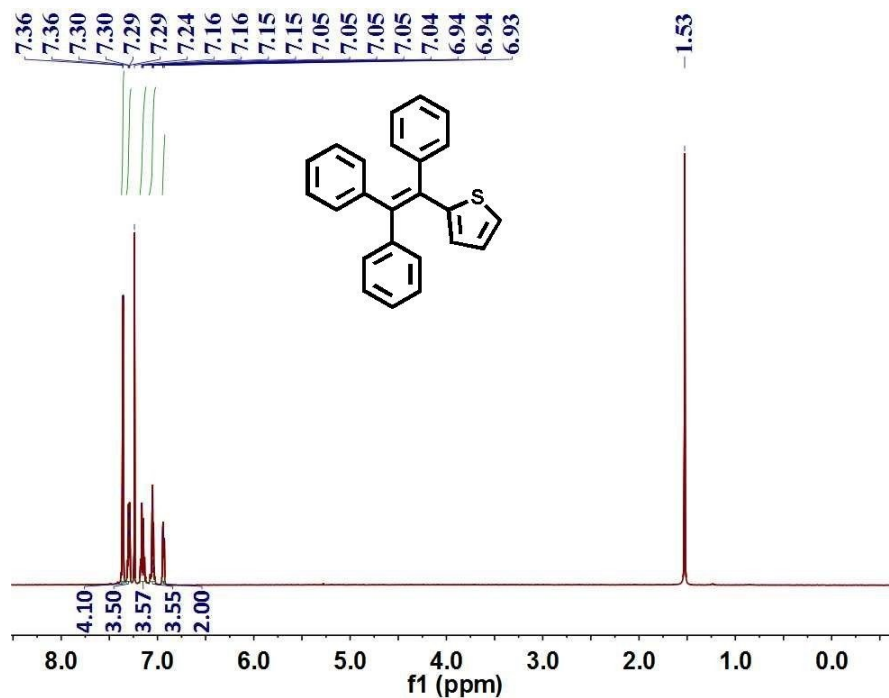

<sup>1</sup>H NMR spectrum of 2-(1,2,2-triphenylvinyl)thiophene (2-TPVT) in CDCl<sub>3</sub>

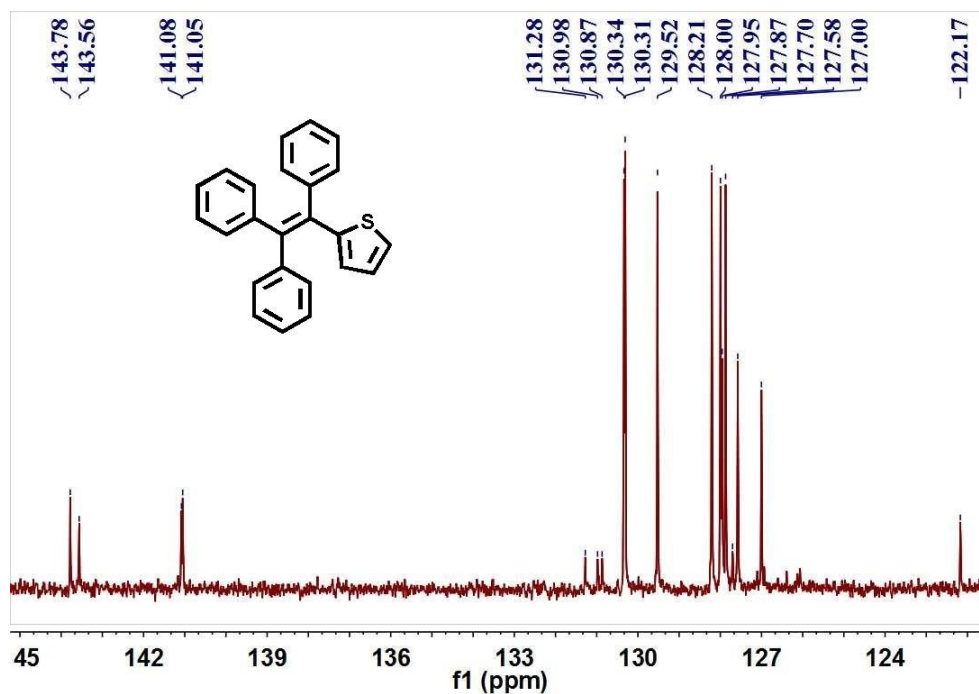

<sup>13</sup>C NMR spectrum of 2-(1,2,2-triphenylvinyl)thiophene (2-TPVT) in CDCl<sub>3</sub>



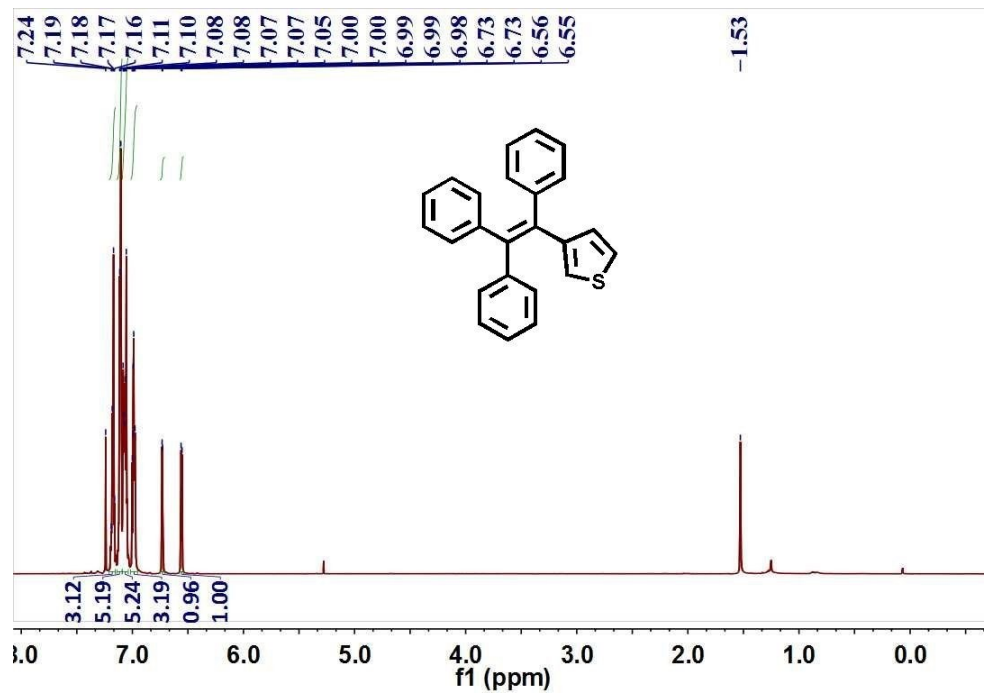

$^1\text{H}$  NMR spectrum of 3-(1,2,2-triphenylvinyl)thiophene (3-TPVT) in  $\text{CDCl}_3$

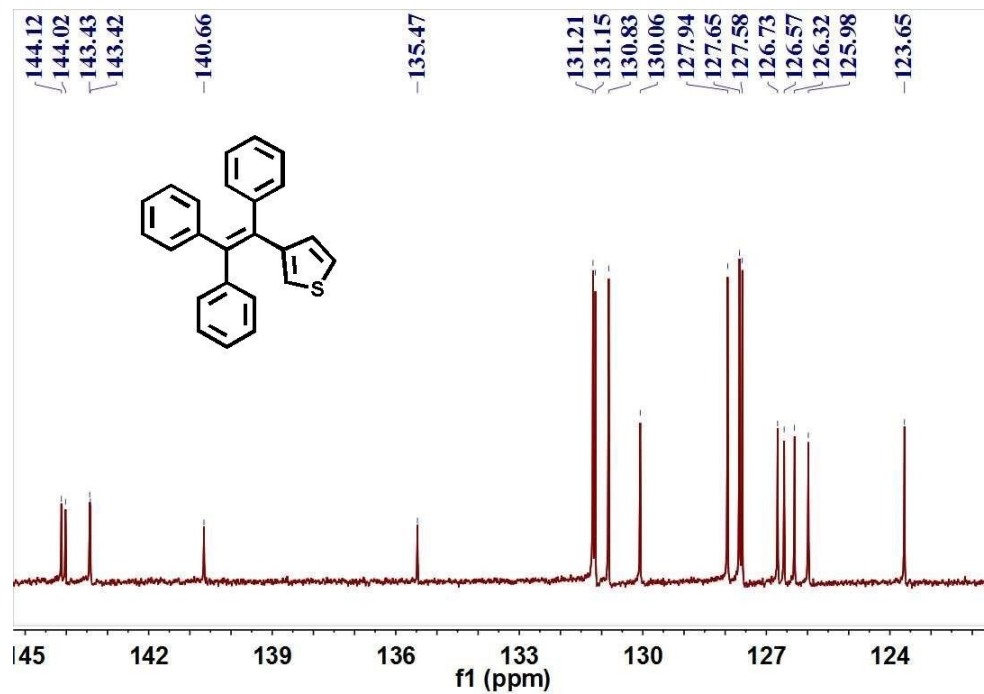

$^{13}\text{C}$  NMR spectrum of 3-(1,2,2-triphenylvinyl)thiophene (3-TPVT) in  $\text{CDCl}_3$

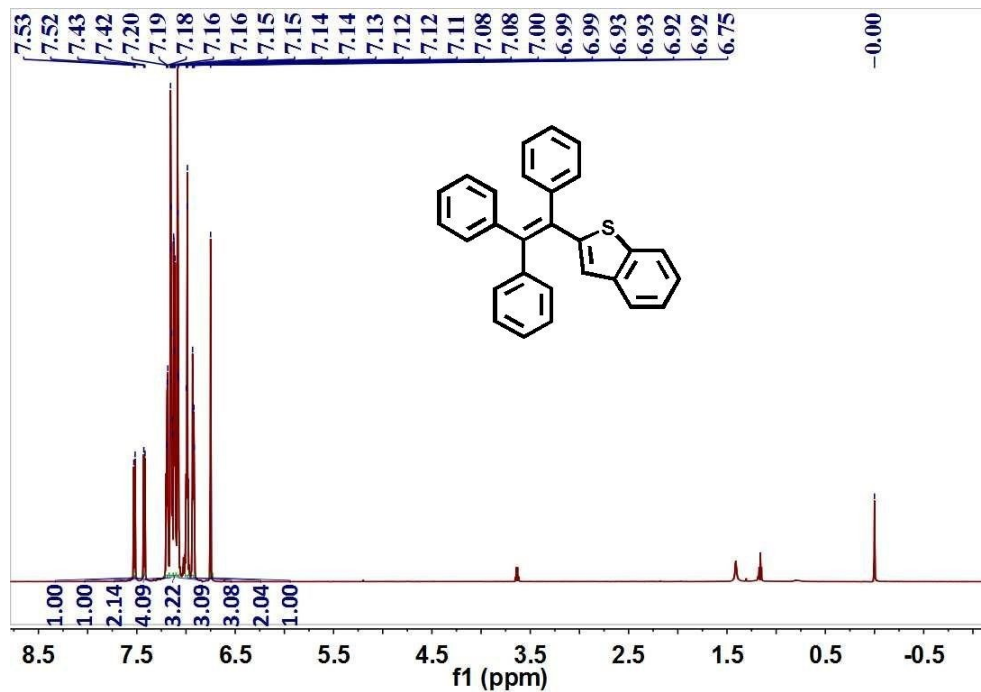

$^1\text{H}$  NMR spectrum of 2-(1,2,2-triphenylvinyl)benzo[*b*]thiophene (2-TPVBT) in  $\text{CDCl}_3$

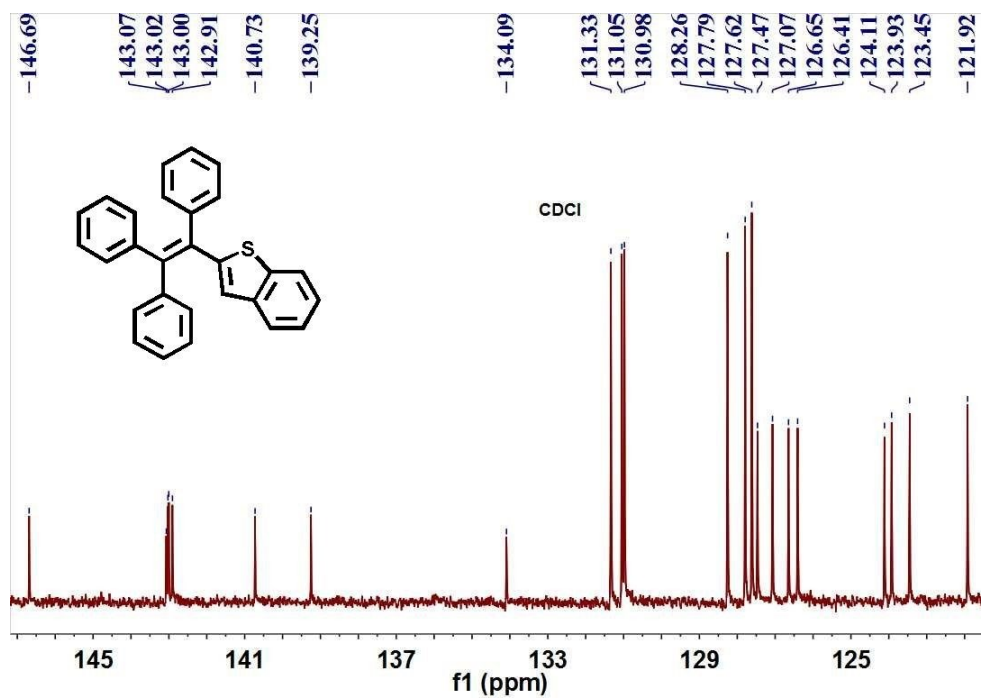

$^{13}\text{C}$  NMR spectrum of 2-(1,2,2-triphenylvinyl)benzo[*b*]thiophene (2-TPVBT) in  $\text{CDCl}_3$

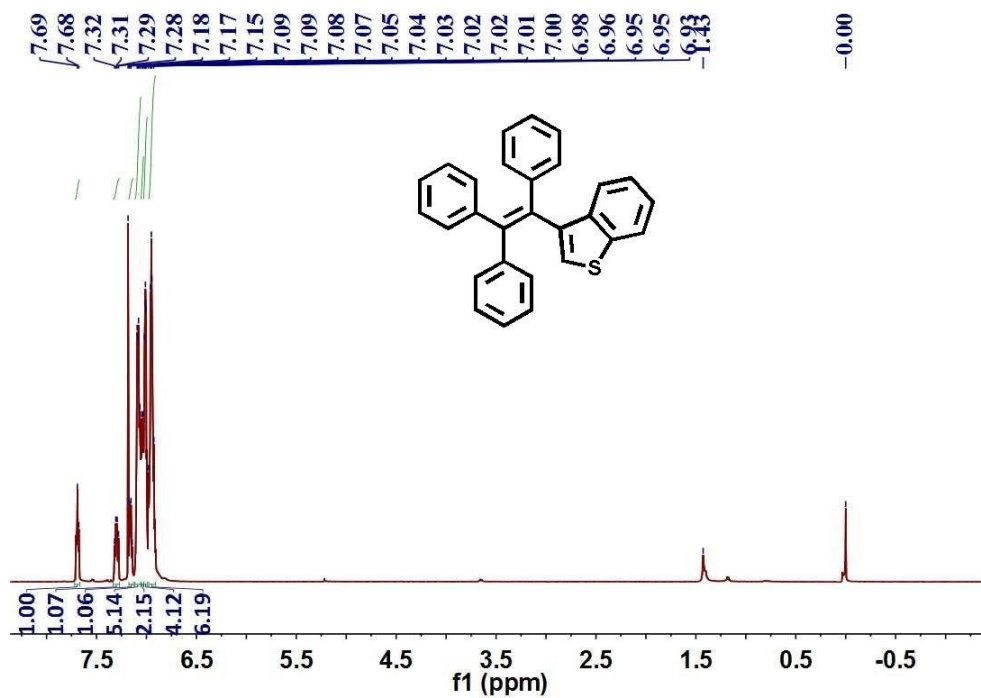

$^1\text{H}$  NMR spectrum of 3-(1,2,2-triphenylvinyl)benzo[*b*]thiophene (3-TPVBT) in  $\text{CDCl}_3$

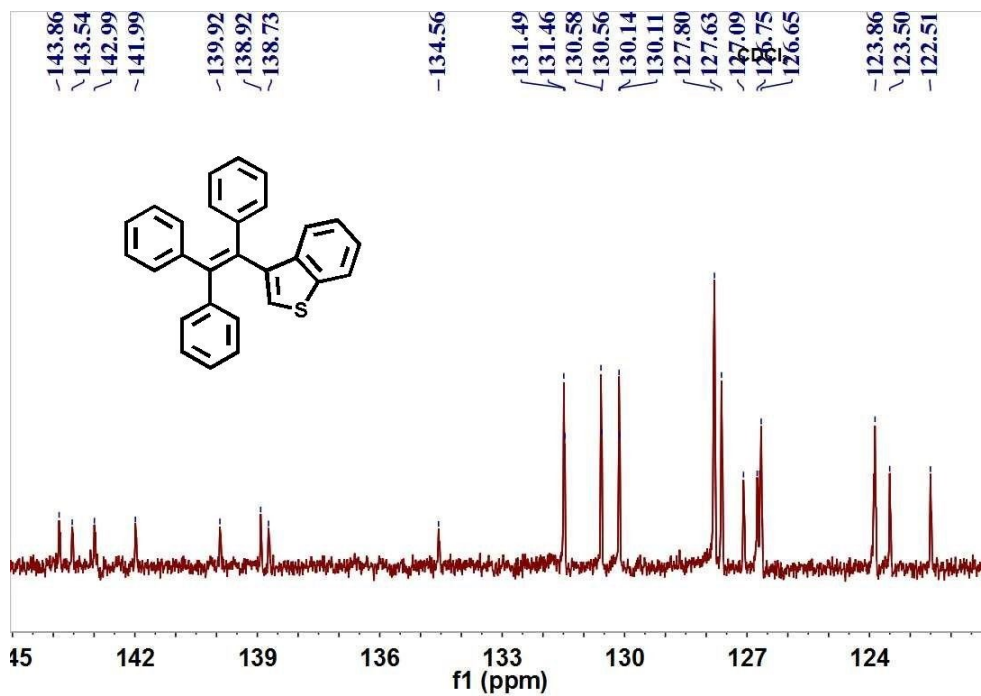

$^{13}\text{C}$  NMR spectrum of 3-(1,2,2-triphenylvinyl)benzo[*b*]thiophene (3-TPVBT) in  $\text{CDCl}_3$

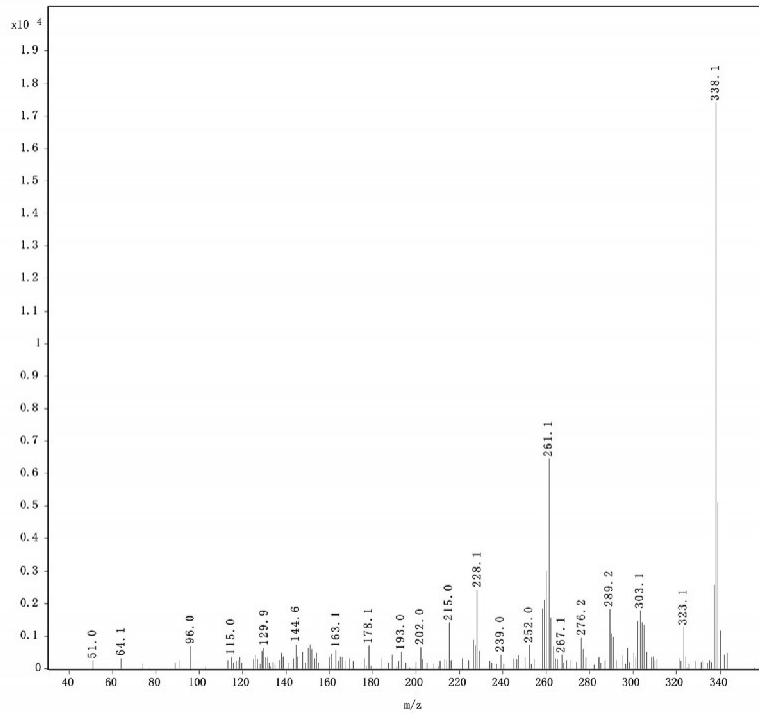

Mass spectrum of 2-(1,2,2-triphenylvinyl)thiophene (2-TPVT)

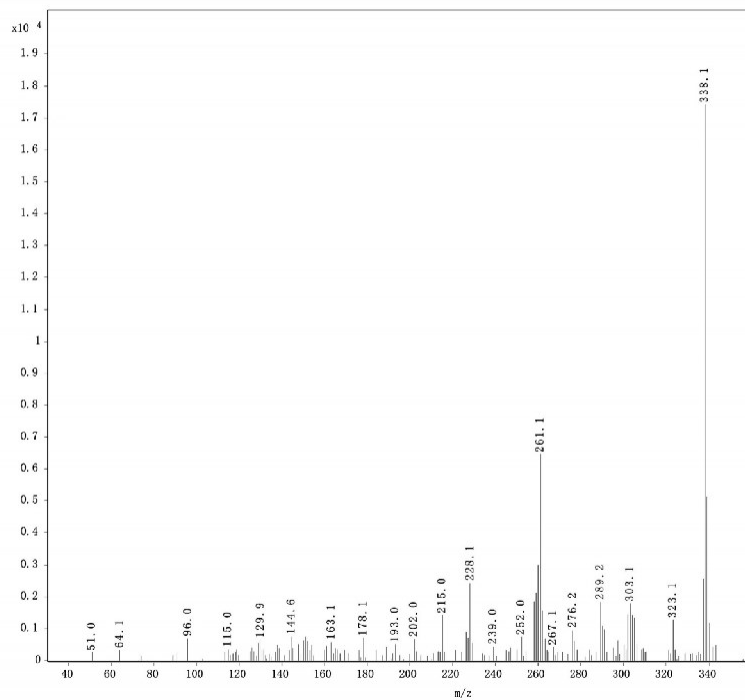

Mass spectrum of 3-(1,2,2-triphenylvinyl)thiophene (3-TPVT)

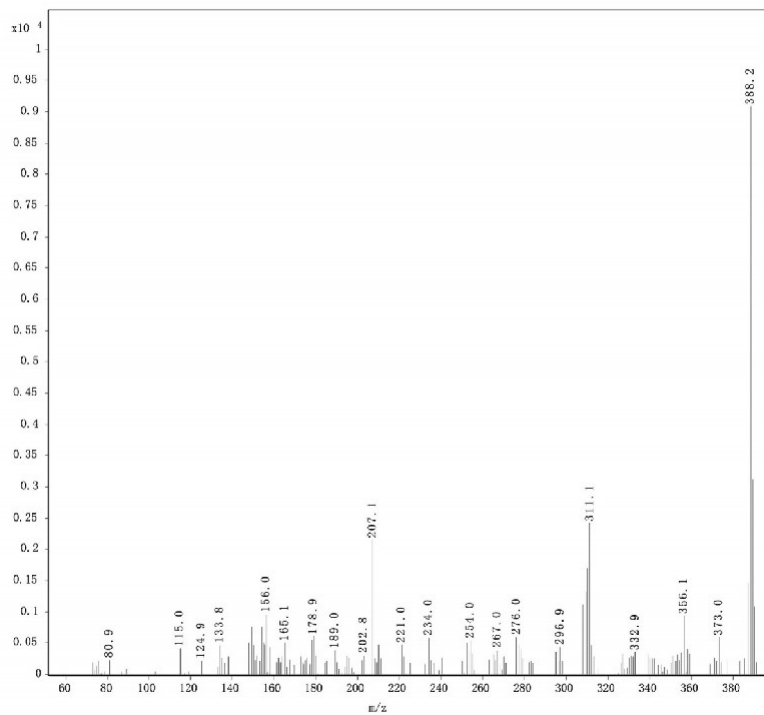

Mass spectrum of 2-(1,2,2-triphenylvinyl)benzo[*b*]thiophene (2-TPVBT)

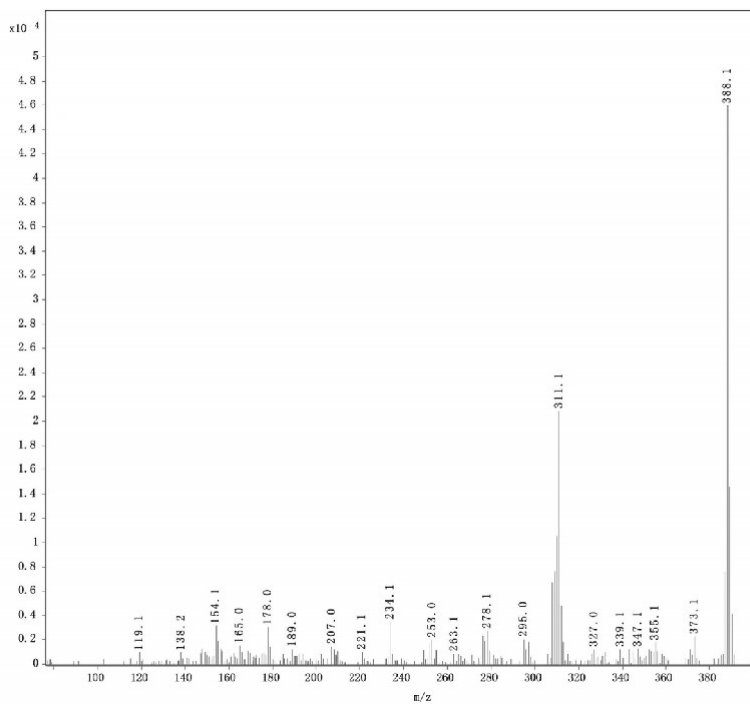

Mass spectrum of 3-(1,2,2-triphenylvinyl)benzo[*b*]thiophene (3-TPVBT)

## 6. Cartesian Coordinates

### TPE

|   |            |             |             |
|---|------------|-------------|-------------|
| C | 5.61270700 | 12.34645900 | 14.33039300 |
| C | 6.63421900 | 12.24237000 | 13.24377800 |
| C | 4.90547500 | 13.00813700 | 16.64278500 |
| C | 6.26934700 | 12.43748900 | 11.90289700 |
| H | 5.24143400 | 12.68444600 | 11.66186400 |
| C | 3.24796000 | 12.87719900 | 18.91458400 |
| C | 5.80817200 | 13.08954100 | 15.45404400 |
| C | 3.57851200 | 14.11174300 | 18.35645500 |
| H | 3.19381600 | 15.02651400 | 18.79399000 |
| C | 7.20882300 | 12.32424400 | 10.88195200 |
| H | 6.90816200 | 12.49289000 | 9.85366400  |
| C | 4.36040000 | 11.56842700 | 14.08286600 |
| C | 4.57285800 | 11.77483800 | 17.22122600 |
| H | 4.96104900 | 10.86239300 | 16.78491400 |
| C | 3.75506700 | 11.70970600 | 18.34624300 |
| H | 3.51522000 | 10.74515700 | 18.78003800 |
| C | 4.40859700 | 14.17634300 | 17.24087300 |
| H | 4.67217700 | 15.14135600 | 16.82262200 |
| C | 4.42570300 | 10.22713200 | 13.67534200 |
| H | 5.39393300 | 9.75307300  | 13.55929300 |
| C | 3.09672800 | 12.16552500 | 14.19688600 |
| H | 3.02587700 | 13.20495000 | 14.49405700 |
| C | 3.26657900 | 9.49813400  | 13.42499700 |
| H | 3.33964500 | 8.45861400  | 13.12454600 |
| C | 8.52933800 | 11.98695800 | 11.17767700 |
| C | 2.01634200 | 10.10282400 | 13.55150900 |
| C | 1.93717200 | 11.44159900 | 13.93174700 |
| H | 0.97058500 | 11.92520200 | 14.02077100 |
| C | 8.90047200 | 11.76657600 | 12.50311600 |
| H | 9.92149600 | 11.49095900 | 12.74323500 |
| H | 9.25966000 | 11.88968000 | 10.38221600 |
| H | 1.11334400 | 9.53810000  | 13.34828600 |
| H | 2.60796300 | 12.82645800 | 19.78833500 |
| C | 7.96331400 | 11.89531400 | 13.52499300 |
| H | 8.26070800 | 11.72253800 | 14.55228700 |
| C | 6.94205100 | 14.05324300 | 15.59742900 |
| C | 7.74617200 | 14.04078800 | 16.74739100 |
| C | 7.19870800 | 15.02567100 | 14.62026200 |

|   |            |             |             |
|---|------------|-------------|-------------|
| C | 8.79235200 | 14.94658100 | 16.89891100 |
| H | 7.55008700 | 13.31142700 | 17.52542000 |
| C | 8.23545100 | 15.94187000 | 14.77764900 |
| H | 6.57804700 | 15.06390500 | 13.73314700 |
| C | 9.04129900 | 15.90235300 | 15.91430700 |
| H | 9.41014100 | 14.91012900 | 17.78955300 |
| H | 8.41222500 | 16.68874700 | 14.01146000 |
| H | 9.85080800 | 16.61342400 | 16.03552300 |

***E*-Product of Photocyclization of TPE in gas**

|   |            |             |             |
|---|------------|-------------|-------------|
| C | 5.58583800 | 12.43510200 | 14.27884300 |
| C | 6.48650300 | 12.49284100 | 13.24409700 |
| C | 4.98710400 | 12.75272900 | 16.73961700 |
| C | 6.24428000 | 11.87562500 | 11.95978300 |
| H | 5.37400400 | 11.24176100 | 11.84560400 |
| C | 3.29044800 | 12.28517500 | 18.93293600 |
| C | 5.90576200 | 13.00538100 | 15.58273100 |
| C | 2.90222200 | 13.15820800 | 17.91753200 |
| H | 1.94360400 | 13.66240400 | 17.97131200 |
| C | 7.04675900 | 12.11731300 | 10.89264300 |
| H | 6.83196700 | 11.65311900 | 9.93655400  |
| C | 4.27184100 | 11.74132300 | 14.08363100 |
| C | 5.36751900 | 11.88135000 | 17.76761900 |
| H | 6.33032500 | 11.38515300 | 17.71151500 |
| C | 4.52664200 | 11.64710900 | 18.85463300 |
| H | 4.83877800 | 10.96704700 | 19.63971300 |
| C | 3.74222200 | 13.38754000 | 16.83025600 |
| H | 3.43181900 | 14.06745000 | 16.04522300 |
| C | 4.03758900 | 10.47006400 | 14.62192100 |
| H | 4.81585900 | 9.98315900  | 15.19834100 |
| C | 3.25303900 | 12.34918100 | 13.34009700 |
| H | 3.42290200 | 13.33223600 | 12.91449700 |
| C | 2.81926400 | 9.82498100  | 14.42201600 |
| H | 2.65769100 | 8.83889800  | 14.84348300 |
| C | 8.13941300 | 13.06602100 | 10.98737100 |
| C | 1.81053600 | 10.44251000 | 13.68366800 |
| C | 2.03118500 | 11.70734800 | 13.14253900 |
| H | 1.25390400 | 12.19560000 | 12.56489100 |
| C | 8.50303200 | 13.56841100 | 12.17797900 |
| H | 9.30484000 | 14.29518500 | 12.24024600 |
| H | 8.63986600 | 13.38441800 | 10.07895900 |

|   |             |             |             |
|---|-------------|-------------|-------------|
| H | 0.86146700  | 9.94097200  | 13.53072700 |
| H | 2.63518800  | 12.10489900 | 19.77777100 |
| C | 7.01497600  | 13.79658400 | 15.75232900 |
| C | 9.29742200  | 14.53109600 | 14.97142300 |
| C | 9.56653100  | 14.99775000 | 16.20103500 |
| H | 10.08357300 | 14.46995400 | 14.22765800 |
| H | 10.57098600 | 15.31318100 | 16.46294500 |
| C | 7.89063700  | 14.15694200 | 14.56036300 |
| H | 7.43762800  | 15.07430900 | 14.12218200 |
| C | 7.87163700  | 13.08479200 | 13.46447500 |
| H | 8.50267700  | 12.24253500 | 13.82666900 |
| C | 8.52616800  | 15.05200600 | 17.20998600 |
| H | 8.73999600  | 15.52040100 | 18.16423800 |
| C | 7.32838300  | 14.44870900 | 17.00354100 |
| H | 6.59982800  | 14.41204800 | 17.80349400 |

**Z-Product of Photocyclization of TPE in gas**

|   |            |             |             |
|---|------------|-------------|-------------|
| C | 5.74357900 | 12.08284500 | 14.29559200 |
| C | 6.54491300 | 12.28906600 | 13.20301500 |
| C | 5.03692700 | 12.79443400 | 16.64615400 |
| C | 6.11902800 | 12.15021400 | 11.81858200 |
| H | 5.35828000 | 11.42636100 | 11.55231900 |
| C | 3.06345900 | 13.05310500 | 18.63632700 |
| C | 6.09809000 | 12.66178800 | 15.60047600 |
| C | 2.93563000 | 13.73403100 | 17.42636300 |
| H | 2.07535600 | 14.37021000 | 17.24940300 |
| C | 6.58146500 | 13.03823100 | 10.89985600 |
| H | 6.22589100 | 12.99383400 | 9.87629200  |
| C | 4.43229100 | 11.37625700 | 14.14806400 |
| C | 5.15421200 | 12.11877200 | 17.86817200 |
| H | 6.01852000 | 11.48718000 | 18.04249100 |
| C | 4.17701300 | 12.24431100 | 18.85398600 |
| H | 4.28591900 | 11.70873000 | 19.79079700 |
| C | 3.91121800 | 13.60313900 | 16.44117000 |
| H | 3.80436200 | 14.13964900 | 15.50559900 |
| C | 4.22571700 | 10.15380200 | 14.80144900 |
| H | 5.01708300 | 9.74000900  | 15.41657700 |
| C | 3.39388600 | 11.89516100 | 13.36464700 |
| H | 3.52914100 | 12.84726500 | 12.86474400 |
| C | 3.02375100 | 9.46466300  | 14.66550500 |
| H | 2.88661000 | 8.51716100  | 15.17486700 |



|   |             |             |             |
|---|-------------|-------------|-------------|
| C | 7.44275500  | 14.14157300 | 11.30260300 |
| C | 1.99900600  | 9.99037700  | 13.87921800 |
| C | 2.18734000  | 11.20933300 | 13.23177900 |
| H | 1.39413900  | 11.63063100 | 12.62382900 |
| C | 8.05901900  | 14.12282900 | 12.49937100 |
| H | 8.69458500  | 14.93594600 | 12.83004100 |
| H | 7.56436100  | 14.98275700 | 10.62830800 |
| H | 1.06125400  | 9.45601100  | 13.77598900 |
| H | 2.30223800  | 13.15248900 | 19.40201700 |
| C | 7.35368600  | 13.17266300 | 15.81499400 |
| C | 9.73318000  | 13.57497700 | 14.99059800 |
| C | 9.96380900  | 14.35280800 | 16.06039900 |
| H | 10.50186500 | 13.42536100 | 14.23816300 |
| H | 10.92134100 | 14.84797200 | 16.18333700 |
| C | 8.43725400  | 12.83750000 | 14.80307700 |
| H | 8.65754700  | 11.77056300 | 14.97743100 |
| C | 7.93773500  | 12.86247500 | 13.33194100 |
| H | 8.59554600  | 12.13970600 | 12.82009600 |
| C | 8.93736600  | 14.55563500 | 17.06533700 |
| H | 9.15521600  | 15.19715000 | 17.91188200 |
| C | 7.70635400  | 13.99507500 | 16.94332600 |
| H | 6.94655000  | 14.20528800 | 17.68559900 |

**1-TPVT in gas**

|   |            |             |             |
|---|------------|-------------|-------------|
| C | 5.59173800 | 12.36674300 | 14.33439400 |
| C | 6.58665800 | 12.31321900 | 13.22081700 |
| C | 4.95491000 | 12.91072500 | 16.70192900 |
| C | 6.19549700 | 12.58226700 | 11.90110100 |
| H | 5.16566300 | 12.85231400 | 11.69560300 |
| C | 3.37660100 | 12.63750600 | 19.01313200 |
| C | 5.81285400 | 13.06345600 | 15.48634400 |
| C | 3.64679600 | 13.90325200 | 18.49356200 |
| H | 3.24509700 | 14.78660800 | 18.97769200 |
| C | 7.11259200 | 12.51311400 | 10.85531600 |
| H | 6.79250900 | 12.73907400 | 9.84405000  |
| C | 4.33292000 | 11.60214700 | 14.08709400 |
| C | 4.68288900 | 11.64535600 | 17.23985800 |
| H | 5.08813500 | 10.76471000 | 16.75617000 |
| C | 3.90376100 | 11.50992800 | 18.38567700 |
| H | 3.71005300 | 10.52234600 | 18.78946600 |
| C | 4.43793000 | 14.03851300 | 17.35651400 |

|   |            |             |             |
|---|------------|-------------|-------------|
| H | 4.65489200 | 15.02598300 | 16.96445000 |
| C | 4.38458400 | 10.28963500 | 13.59207800 |
| H | 5.34816900 | 9.82827200  | 13.40753700 |
| C | 3.07320700 | 12.18493400 | 14.28938100 |
| H | 3.01154600 | 13.20353500 | 14.65259200 |
| C | 3.21778600 | 9.57295200  | 13.34273600 |
| H | 3.28078900 | 8.55477100  | 12.97466600 |
| C | 8.43466200 | 12.14757700 | 11.10481800 |
| C | 1.97235800 | 10.16253000 | 13.55781900 |
| C | 1.90566200 | 11.47386300 | 14.02574900 |
| H | 0.94249500 | 11.94647800 | 14.18370700 |
| C | 8.83080800 | 11.85296400 | 12.40908200 |
| H | 9.85333000 | 11.55423300 | 12.61226000 |
| H | 9.14734100 | 12.08497300 | 10.29011900 |
| H | 1.06316400 | 9.60757200  | 13.35538300 |
| H | 2.76688900 | 12.53189500 | 19.90346900 |
| C | 6.91666100 | 14.03434600 | 15.60878100 |
| C | 8.40936500 | 15.78991900 | 15.18369000 |
| C | 8.88116400 | 15.37602800 | 16.39789900 |
| H | 8.83693400 | 16.61436000 | 14.62815900 |
| H | 9.70681700 | 15.77373300 | 16.96818100 |
| C | 7.29404800 | 15.02799200 | 14.73814800 |
| H | 6.78233400 | 15.20231100 | 13.80139400 |
| C | 7.91734300 | 11.93792600 | 13.45574900 |
| H | 8.23379800 | 11.70963300 | 14.46662600 |
| S | 7.95779300 | 14.05267600 | 17.02380600 |

***E*-Product of Photocyclization of 2-TPVT in gas**

|   |            |             |             |
|---|------------|-------------|-------------|
| C | 5.57295000 | 12.43826700 | 14.24896000 |
| C | 6.51121500 | 12.44433900 | 13.25003900 |
| C | 5.04225900 | 12.71553600 | 16.76585800 |
| C | 6.29217500 | 11.82146900 | 11.96289300 |
| H | 5.37687300 | 11.26239300 | 11.81271600 |
| C | 3.49667900 | 12.15518300 | 19.04223800 |
| C | 5.88445800 | 13.01743700 | 15.56654400 |
| C | 3.04451200 | 13.07345300 | 18.09596300 |
| H | 2.09358100 | 13.57534700 | 18.23654700 |
| C | 7.17699300 | 11.95043300 | 10.94516700 |
| H | 6.97807500 | 11.47647400 | 9.99058000  |
| C | 4.23058100 | 11.81046300 | 14.03686600 |
| C | 5.48839900 | 11.79733300 | 17.72405500 |

|   |            |             |             |
|---|------------|-------------|-------------|
| H | 6.44309700 | 11.30301200 | 17.58133900 |
| C | 4.72196500 | 11.51850300 | 18.85403700 |
| H | 5.08249800 | 10.80462500 | 19.58650900 |
| C | 3.81164500 | 13.35166400 | 16.96689800 |
| H | 3.45432000 | 14.06564300 | 16.23372700 |
| C | 3.93087100 | 10.54547400 | 14.55727100 |
| H | 4.68318200 | 10.01014900 | 15.12507800 |
| C | 3.24338400 | 12.48317300 | 13.30635300 |
| H | 3.46367200 | 13.46280300 | 12.89631700 |
| C | 2.67972700 | 9.96838500  | 14.35102500 |
| H | 2.46721300 | 8.98622300  | 14.75872000 |
| C | 8.36887800 | 12.76921500 | 11.08833900 |
| C | 1.70392400 | 10.64894100 | 13.62426600 |
| C | 1.98963500 | 11.90860600 | 13.10166400 |
| H | 1.23807500 | 12.44532300 | 12.53303000 |
| C | 8.69625300 | 13.30692400 | 12.27289300 |
| H | 9.58843200 | 13.91597000 | 12.37041800 |
| H | 8.98567200 | 12.95214600 | 10.21460700 |
| H | 0.72966400 | 10.20025700 | 13.46565600 |
| H | 2.89903200 | 11.93913200 | 19.92078000 |
| C | 6.95030100 | 13.84418600 | 15.66260400 |
| C | 9.06653900 | 14.82228000 | 15.00713900 |
| C | 9.02604400 | 15.11712100 | 16.30703600 |
| H | 9.90808600 | 15.07810200 | 14.37600100 |
| H | 9.79222700 | 15.61434800 | 16.88633900 |
| C | 7.79413500 | 14.22200800 | 14.46032000 |
| H | 7.25590700 | 15.01757300 | 13.90557900 |
| C | 7.90690900 | 13.01570400 | 13.52659300 |
| H | 8.46299500 | 12.23226800 | 14.08344700 |
| S | 7.52846000 | 14.64169000 | 17.13790700 |

**Z-Product of Photocyclization of 2-TPVT in gas**

|   |            |             |             |
|---|------------|-------------|-------------|
| C | 5.74382300 | 12.06594700 | 14.27414600 |
| C | 6.54809900 | 12.29573200 | 13.19471300 |
| C | 5.05879800 | 12.78470000 | 16.65954100 |
| C | 6.13904300 | 12.16190000 | 11.80034400 |
| H | 5.40697100 | 11.41579800 | 11.51520900 |
| C | 3.13213700 | 13.16818700 | 18.67194700 |
| C | 6.10371200 | 12.60310000 | 15.60990400 |
| C | 2.97367100 | 13.76869100 | 17.42332300 |
| H | 2.10717700 | 14.39008600 | 17.22568200 |

|   |             |             |             |
|---|-------------|-------------|-------------|
| C | 6.58587000  | 13.07384000 | 10.89983700 |
| H | 6.24827700  | 13.03196900 | 9.87012400  |
| C | 4.43478200  | 11.36120500 | 14.12415500 |
| C | 5.20799400  | 12.19037700 | 17.91941300 |
| H | 6.07590400  | 11.57014100 | 18.11433700 |
| C | 4.25311900  | 12.37835900 | 18.91699100 |
| H | 4.38520300  | 11.90533600 | 19.88390200 |
| C | 3.92623300  | 13.57697900 | 16.42668500 |
| H | 3.79615300  | 14.05140600 | 15.46121200 |
| C | 4.20640200  | 10.16807400 | 14.82441200 |
| H | 4.98138200  | 9.77711300  | 15.47428400 |
| C | 3.41504300  | 11.85321000 | 13.29919700 |
| H | 3.56362000  | 12.78608900 | 12.76830700 |
| C | 3.00491500  | 9.47885400  | 14.68966300 |
| H | 2.85170300  | 8.55394600  | 15.23465600 |
| C | 7.41414000  | 14.19493500 | 11.32924000 |
| C | 2.00018400  | 9.97615100  | 13.85981200 |
| C | 2.20830400  | 11.16723800 | 13.16839100 |
| H | 1.42970700  | 11.56783500 | 12.52843000 |
| C | 8.03046200  | 14.16617200 | 12.52503100 |
| H | 8.64285200  | 14.98849100 | 12.87704200 |
| H | 7.51171500  | 15.05442800 | 10.67442600 |
| H | 1.06206200  | 9.44215000  | 13.75823800 |
| H | 2.38809900  | 13.31575700 | 19.44670400 |
| C | 7.36016900  | 13.06021800 | 15.80264100 |
| C | 9.60709700  | 13.72768200 | 15.15746400 |
| C | 9.46879000  | 14.35087300 | 16.32813000 |
| H | 10.49920800 | 13.80252100 | 14.54732100 |
| H | 10.18838400 | 14.99687900 | 16.81249400 |
| C | 8.45665600  | 12.83062500 | 14.78677300 |
| H | 8.78465500  | 11.78843700 | 14.93310600 |
| C | 7.94232100  | 12.88269800 | 13.32530500 |
| H | 8.59536800  | 12.18033600 | 12.78118900 |
| S | 7.93133900  | 14.04714900 | 17.16362100 |

**2-TPVT in gas**

|   |            |             |             |
|---|------------|-------------|-------------|
| C | 5.57388300 | 12.41354000 | 14.31854700 |
| C | 6.55058200 | 12.41294600 | 13.18645200 |
| C | 4.95206200 | 12.91891400 | 16.69811600 |
| C | 6.12576500 | 12.69132300 | 11.87907600 |

|   |            |             |             |
|---|------------|-------------|-------------|
| H | 5.08286900 | 12.92607000 | 11.69699000 |
| C | 3.42565100 | 12.59785100 | 19.04079900 |
| C | 5.79026000 | 13.10124300 | 15.47371000 |
| C | 3.68240600 | 13.87339000 | 18.53941400 |
| H | 3.29018500 | 14.74676100 | 19.04888500 |
| C | 7.02503200 | 12.67501300 | 10.81574000 |
| H | 6.67794200 | 12.90705200 | 9.81479600  |
| C | 4.34040400 | 11.60489400 | 14.07901000 |
| C | 4.69501000 | 11.64298500 | 17.22003500 |
| H | 5.09141400 | 10.77211900 | 16.71205300 |
| C | 3.94147100 | 11.48392800 | 18.37976800 |
| H | 3.75858500 | 10.48815800 | 18.76841300 |
| C | 4.44788900 | 14.03211700 | 17.38728400 |
| H | 4.65397700 | 15.02781100 | 17.01072800 |
| C | 4.43316000 | 10.29758700 | 13.57677500 |
| H | 5.41060600 | 9.87185300  | 13.37946500 |
| C | 3.06318900 | 12.14156800 | 14.29747800 |
| H | 2.96990100 | 13.15530800 | 14.66780200 |
| C | 3.28991300 | 9.54096700  | 13.33600000 |
| H | 3.38498900 | 8.52747300  | 12.96185900 |
| C | 8.36426700 | 12.35483900 | 11.03443100 |
| C | 2.02670900 | 10.08492000 | 13.56717000 |
| C | 1.91863600 | 11.39086100 | 14.04245100 |
| H | 0.94103800 | 11.82811700 | 14.21321900 |
| C | 8.79501700 | 12.05152000 | 12.32553700 |
| H | 9.83155900 | 11.78781100 | 12.50479000 |
| H | 9.06355300 | 12.33420400 | 10.20611800 |
| H | 1.13562200 | 9.49902700  | 13.37144400 |
| H | 2.83567800 | 12.47368600 | 19.94196600 |
| C | 6.88235400 | 14.09743800 | 15.62453800 |
| C | 8.67647000 | 15.15833000 | 16.68812400 |
| H | 9.45348400 | 15.41184500 | 17.39278500 |
| C | 7.14808000 | 15.11078500 | 14.73743000 |
| H | 6.64741700 | 15.32141500 | 13.80557300 |
| C | 7.89808300 | 12.08228600 | 13.38967800 |
| H | 8.24101200 | 11.84708900 | 14.39036100 |
| C | 7.76515200 | 14.14785700 | 16.75787000 |
| H | 7.71469400 | 13.44764100 | 17.58119100 |
| S | 8.47015700 | 16.10099400 | 15.24611600 |

***E*-Product of Photocyclization of 3-TPVT in gas**

|   |            |             |             |
|---|------------|-------------|-------------|
| C | 5.56561700 | 12.44994400 | 14.21632600 |
| C | 6.47041700 | 12.48091500 | 13.18231300 |
| C | 5.08026800 | 12.70183600 | 16.73553600 |
| C | 6.21082900 | 11.88878700 | 11.88927200 |
| H | 5.29551400 | 11.32556600 | 11.75681300 |
| C | 3.55708800 | 12.16905300 | 19.03807800 |
| C | 5.91365500 | 12.99852700 | 15.52888400 |
| C | 3.06090600 | 13.01542900 | 18.04733600 |
| H | 2.08463300 | 13.47323400 | 18.16284600 |
| C | 7.05674500 | 12.05298700 | 10.84296800 |
| H | 6.82541600 | 11.60226000 | 9.88446200  |
| C | 4.22866700 | 11.80191800 | 14.02759100 |
| C | 5.56911900 | 11.85550500 | 17.73869800 |
| H | 6.54699800 | 11.40191000 | 17.61871500 |
| C | 4.81446400 | 11.58978800 | 18.88056100 |
| H | 5.20932500 | 10.92968100 | 19.64514500 |
| C | 3.81513000 | 13.27818800 | 16.90627000 |
| H | 3.42114900 | 13.93654600 | 16.14084300 |
| C | 3.96460100 | 10.52724000 | 14.54353800 |
| H | 4.73862800 | 10.00295300 | 15.09229800 |
| C | 3.21463200 | 12.45982900 | 13.32101900 |
| H | 3.40710400 | 13.44661500 | 12.91396700 |
| C | 2.72160600 | 9.92662100  | 14.35677300 |
| H | 2.53679800 | 8.93719100  | 14.76038000 |
| C | 8.24574200 | 12.87919300 | 10.96200100 |
| C | 1.71832100 | 10.59296900 | 13.65452900 |
| C | 1.96866300 | 11.86190400 | 13.13628000 |
| H | 1.19568600 | 12.38761500 | 12.58641500 |
| C | 8.61485800 | 13.38182600 | 12.14928100 |
| H | 9.50433100 | 13.99744200 | 12.23839900 |
| H | 8.82488100 | 13.09570200 | 10.07059500 |
| H | 0.75040600 | 10.12583900 | 13.51115100 |
| H | 2.96834100 | 11.96367200 | 19.92510100 |
| C | 7.00933000 | 13.80458700 | 15.64542500 |
| C | 8.75936800 | 15.00325700 | 16.63785700 |
| H | 9.34631000 | 15.51788900 | 17.38640700 |
| C | 7.79243900 | 14.18724600 | 14.40567500 |
| H | 7.29831300 | 15.04700700 | 13.92636800 |
| C | 7.87773100 | 13.03730200 | 13.42044900 |
| H | 8.45725500 | 12.23169300 | 13.91997200 |
| C | 7.54561700 | 14.44055100 | 16.82339300 |

|   |            |             |             |
|---|------------|-------------|-------------|
| H | 7.03973300 | 14.43373000 | 17.77946200 |
| S | 9.42801000 | 14.83416000 | 15.01913300 |

**Z-Product of Photocyclization of 3-TPVT in gas**

|   |            |             |             |
|---|------------|-------------|-------------|
| C | 5.75107600 | 12.07430100 | 14.25279700 |
| C | 6.55144400 | 12.26939100 | 13.15996800 |
| C | 5.10306500 | 12.78396400 | 16.64301200 |
| C | 6.13004400 | 12.11232200 | 11.77363000 |
| H | 5.38455400 | 11.37134200 | 11.51102600 |
| C | 3.21131500 | 13.11878700 | 18.70087300 |
| C | 6.12835900 | 12.62296400 | 15.57033300 |
| C | 3.01454200 | 13.72169400 | 17.45894100 |
| H | 2.13197600 | 14.32678900 | 17.28287600 |
| C | 6.58112600 | 12.99978600 | 10.85003500 |
| H | 6.23325500 | 12.94063500 | 9.82465200  |
| C | 4.42976800 | 11.38805900 | 14.11350000 |
| C | 5.28941500 | 12.18632600 | 17.89710000 |
| H | 6.17312900 | 11.58140500 | 18.06840000 |
| C | 4.35319900 | 12.35008600 | 18.91653100 |
| H | 4.51521200 | 11.87358700 | 19.87728200 |
| C | 3.94901300 | 13.55377100 | 16.44065400 |
| H | 3.78750600 | 14.03095400 | 15.48135500 |
| C | 4.19036200 | 10.19596500 | 14.81122200 |
| H | 4.96526200 | 9.79076800  | 15.45237100 |
| C | 3.41078800 | 11.89789700 | 13.29881300 |
| H | 3.56998400 | 12.82884900 | 12.76740700 |
| C | 2.97692500 | 9.52587200  | 14.68570300 |
| H | 2.81470800 | 8.60136400  | 15.22874200 |
| C | 7.41947400 | 14.12256700 | 11.25112300 |
| C | 1.97215100 | 10.04159900 | 13.86735500 |
| C | 2.19218900 | 11.23145300 | 13.17740900 |
| H | 1.41435300 | 11.64555900 | 12.54519100 |
| C | 8.03985500 | 14.11840100 | 12.44524400 |
| H | 8.65525200 | 14.94307000 | 12.78194800 |
| H | 7.51741000 | 14.96846600 | 10.57899800 |
| H | 1.02509500 | 9.52229500  | 13.77272600 |
| H | 2.48120700 | 13.24693200 | 19.49210700 |
| C | 7.39265300 | 13.09771800 | 15.75962500 |
| C | 9.17377400 | 14.35178200 | 16.62870200 |
| H | 9.73176400 | 15.00510200 | 17.28551200 |
| C | 8.44922300 | 12.79059700 | 14.72093900 |

|   |            |             |             |
|---|------------|-------------|-------------|
| H | 8.77086300 | 11.75931500 | 14.89712400 |
| C | 7.95439700 | 12.84578600 | 13.26459000 |
| H | 8.59572600 | 12.13163200 | 12.72246000 |
| C | 7.91295200 | 13.90947400 | 16.82955900 |
| H | 7.32521000 | 14.19188500 | 17.69234900 |
| S | 9.93297900 | 13.83273200 | 15.13083100 |

## 2-TPVBT in gas

|   |             |             |             |
|---|-------------|-------------|-------------|
| C | 3.54108700  | 15.20332800 | 13.60250000 |
| C | 4.54458400  | 15.15149500 | 12.49680000 |
| C | 2.93259900  | 15.50969000 | 16.02213500 |
| C | 4.22977500  | 15.65931300 | 11.22781700 |
| H | 3.25685500  | 16.10755000 | 11.06001500 |
| C | 1.27703100  | 15.18618100 | 18.27132600 |
| C | 3.83634300  | 15.68486800 | 14.84342800 |
| C | 1.76872700  | 16.44782800 | 17.93784700 |
| H | 1.51161400  | 17.30928600 | 18.54430800 |
| C | 5.15177200  | 15.60074000 | 10.18593400 |
| H | 4.89379100  | 16.01191500 | 9.21613500  |
| C | 2.18486600  | 14.69149600 | 13.24292600 |
| C | 2.43958300  | 14.24580400 | 16.37410600 |
| H | 2.70357400  | 13.38568200 | 15.77062400 |
| C | 1.62116200  | 14.08509900 | 17.48875400 |
| H | 1.25409800  | 13.09807200 | 17.74735500 |
| C | 2.59771700  | 16.60546800 | 16.83106700 |
| H | 2.98780900  | 17.58689500 | 16.58492900 |
| C | 2.04383500  | 13.46406500 | 12.57717400 |
| H | 2.92759200  | 12.88131500 | 12.34328400 |
| C | 1.02875200  | 15.43949500 | 13.50877300 |
| H | 1.11850700  | 16.39772300 | 14.00603800 |
| C | 0.78666900  | 12.98468500 | 12.22097200 |
| C | 6.39849800  | 15.00931700 | 10.38517600 |
| C | -0.35510300 | 13.73571200 | 12.49880200 |
| C | -0.22772900 | 14.96812100 | 13.13772500 |
| H | -1.10810500 | 15.56581300 | 13.34664400 |
| C | 6.71479000  | 14.47827800 | 11.63517200 |
| H | 7.67710500  | 14.00547300 | 11.79740700 |
| H | 7.11391800  | 14.95592200 | 9.57225900  |
| H | -1.33395200 | 13.36707000 | 12.21332600 |
| H | 0.63774400  | 15.06146800 | 19.13811100 |
| H | 0.69866100  | 12.02690900 | 11.72000500 |



|   |             |             |             |
|---|-------------|-------------|-------------|
| C | 7.24144600  | 17.26631000 | 16.11485500 |
| C | 6.83795700  | 17.98205300 | 14.96194600 |
| C | 7.64432200  | 19.04013500 | 14.50522000 |
| C | 8.80987800  | 19.35636700 | 15.18495000 |
| C | 9.19388600  | 18.63332500 | 16.32746900 |
| C | 8.41497200  | 17.58555900 | 16.80156800 |
| C | 5.08231000  | 16.42930800 | 15.11147500 |
| H | 7.35197300  | 19.59861600 | 13.62263400 |
| H | 9.43470300  | 20.16941300 | 14.83327300 |
| H | 10.10872900 | 18.89576000 | 16.84640200 |
| H | 8.71283000  | 17.03056200 | 17.68358900 |
| C | 5.79833400  | 14.55040600 | 12.68032800 |
| H | 6.05284800  | 14.13597800 | 13.64869400 |
| C | 5.60658800  | 17.48201700 | 14.42239300 |
| H | 5.13123000  | 17.89347900 | 13.54170800 |
| S | 6.09084200  | 16.00367100 | 16.50839800 |

***E*-Product of Photocyclization of 2-TPVBT in gas**

|   |             |             |             |
|---|-------------|-------------|-------------|
| C | 3.54544600  | 15.35810300 | 13.60976400 |
| C | 4.51935300  | 15.45439700 | 12.65354900 |
| C | 2.78802000  | 15.57733400 | 16.06820300 |
| C | 4.35519100  | 14.91699300 | 11.31898800 |
| H | 3.49968000  | 14.28352400 | 11.12077200 |
| C | 0.95921600  | 15.07598900 | 18.13923700 |
| C | 3.77568700  | 15.85030600 | 14.97659300 |
| C | 0.67339700  | 16.03378400 | 17.16772300 |
| H | -0.25710400 | 16.58907900 | 17.20880300 |
| C | 5.20836000  | 15.23130900 | 10.31339400 |
| H | 5.05379700  | 14.82385700 | 9.32070300  |
| C | 2.22991100  | 14.71845600 | 13.29091100 |
| C | 3.06689700  | 14.62025800 | 17.05125600 |
| H | 4.00200500  | 14.07272600 | 17.00870100 |
| C | 2.15976300  | 14.37074800 | 18.07907700 |
| H | 2.39161100  | 13.62555300 | 18.83207900 |
| C | 1.58104200  | 16.28237800 | 16.14050600 |
| H | 1.35201600  | 17.02776100 | 15.38745100 |
| C | 1.91028300  | 13.44132600 | 13.76816300 |
| H | 2.62614800  | 12.90595700 | 14.38112900 |
| C | 1.29043000  | 15.38999500 | 12.49897000 |
| H | 1.52653000  | 16.37890600 | 12.12165300 |
| C | 0.68688200  | 12.85098800 | 13.45961200 |

|   |             |             |             |
|---|-------------|-------------|-------------|
| C | 6.26753900  | 16.19910700 | 10.52639200 |
| C | -0.24212300 | 13.53093900 | 12.67312900 |
| C | 0.06339100  | 14.80294900 | 12.19359300 |
| H | -0.65198500 | 15.33974500 | 11.58016700 |
| C | 6.57124100  | 16.61619600 | 11.76548000 |
| H | 7.32525900  | 17.37865000 | 11.91391900 |
| H | 6.78581800  | 16.61009200 | 9.66627600  |
| H | -1.19568100 | 13.07259900 | 12.43598600 |
| H | 0.25224200  | 14.88184400 | 18.93807300 |
| H | 0.45920700  | 11.85920800 | 13.83441600 |
| C | 6.98888500  | 17.51214500 | 16.28123700 |
| C | 7.19208400  | 17.24270700 | 14.91838900 |
| C | 8.49348200  | 17.29068400 | 14.42326700 |
| C | 9.55651000  | 17.62770800 | 15.26596100 |
| C | 9.32647200  | 17.92727700 | 16.60675700 |
| C | 8.03447100  | 17.86538100 | 17.12815200 |
| C | 4.88291600  | 16.58277800 | 15.22802500 |
| H | 8.70051500  | 17.05955500 | 13.38690900 |
| H | 10.56494200 | 17.65443200 | 14.86978800 |
| H | 10.15381500 | 18.19304500 | 17.25489900 |
| H | 7.85280500  | 18.06973800 | 18.17696200 |
| C | 5.90792000  | 16.00860800 | 12.98693600 |
| H | 6.51340000  | 15.12992400 | 13.28770600 |
| C | 5.88866000  | 16.98472000 | 14.17112900 |
| H | 5.54645500  | 17.96494600 | 13.78336700 |
| S | 5.29963300  | 17.29109700 | 16.79774800 |

**Z-Product of Photocyclization of 2-TPVBT in gas**

|   |            |             |             |
|---|------------|-------------|-------------|
| C | 3.51894900 | 15.66908800 | 13.56243500 |
| C | 4.42837300 | 15.94025500 | 12.57298000 |
| C | 2.53502100 | 16.16012100 | 15.90370500 |
| C | 4.53033800 | 15.18255000 | 11.34796800 |
| H | 3.84069100 | 14.36344100 | 11.19040500 |
| C | 0.68460300 | 15.74422400 | 17.97633400 |
| C | 3.53917200 | 16.42506900 | 14.82864600 |
| C | 0.75348000 | 16.98023900 | 17.33884700 |
| H | 0.09284300 | 17.78614000 | 17.63882500 |
| C | 5.47907400 | 15.44503300 | 10.41466600 |
| H | 5.53234300 | 14.84017100 | 9.51644700  |
| C | 2.51497700 | 14.57212000 | 13.40138000 |
| C | 2.45740900 | 14.92171500 | 16.55389800 |

|   |             |             |             |
|---|-------------|-------------|-------------|
| H | 3.12234200  | 14.11895200 | 16.26002600 |
| C | 1.54299900  | 14.71758100 | 17.58281300 |
| H | 1.50242100  | 13.75525000 | 18.08095800 |
| C | 1.67577800  | 17.18659400 | 16.31363300 |
| H | 1.72829300  | 18.15035100 | 15.81907500 |
| C | 2.90703900  | 13.22730900 | 13.39618700 |
| H | 3.95485500  | 12.98036600 | 13.52827300 |
| C | 1.15535100  | 14.87008000 | 13.24287900 |
| H | 0.83268000  | 15.90506900 | 13.24950300 |
| C | 1.96869000  | 12.20950300 | 13.23174800 |
| C | 6.45181700  | 16.50453400 | 10.60307000 |
| C | 0.61982800  | 12.52010000 | 13.07115100 |
| C | 0.21680200  | 13.85487700 | 13.07658800 |
| H | -0.83051600 | 14.10692500 | 12.95195700 |
| C | 6.38428000  | 17.31346900 | 11.67205400 |
| H | 7.09569100  | 18.12263300 | 11.80183800 |
| H | 7.23366400  | 16.63703600 | 9.86267400  |
| H | -0.11125000 | 11.72951600 | 12.94450500 |
| H | -0.02932700 | 15.58121100 | 18.77593800 |
| H | 2.29244600  | 11.17439000 | 13.23290000 |
| C | 6.78831800  | 17.30401700 | 16.24002000 |
| C | 6.93796600  | 17.16194400 | 14.84813800 |
| C | 8.17222600  | 16.76509600 | 14.34382400 |
| C | 9.24020100  | 16.52868000 | 15.21593500 |
| C | 9.08218900  | 16.70423200 | 16.58860400 |
| C | 7.84791000  | 17.09236600 | 17.11385400 |
| C | 4.56729900  | 17.26887300 | 15.09075000 |
| H | 8.30948500  | 16.63274900 | 13.27843200 |
| H | 10.19571200 | 16.20738400 | 14.81752400 |
| H | 9.91491900  | 16.52347500 | 17.25897600 |
| H | 7.71526600  | 17.20396300 | 18.18385300 |
| C | 5.26981000  | 17.20602400 | 12.67749700 |
| H | 4.55728900  | 18.00801000 | 12.40584600 |
| C | 5.66939500  | 17.60448200 | 14.12053300 |
| H | 5.74985700  | 18.70185600 | 14.09251300 |
| S | 5.11500500  | 17.71790900 | 16.73888200 |

### 3-TPVBT in gas

|   |            |             |             |
|---|------------|-------------|-------------|
| C | 3.72397700 | 15.94074000 | 14.01296600 |
| C | 4.55401000 | 16.41140200 | 12.86219600 |
| C | 3.02923500 | 16.06113800 | 16.42876500 |

|   |             |             |             |
|---|-------------|-------------|-------------|
| C | 5.07549000  | 15.49211600 | 11.93972200 |
| H | 4.88262300  | 14.43380600 | 12.07601500 |
| C | 1.30576800  | 15.58984300 | 18.60567700 |
| C | 3.96125900  | 16.33775200 | 15.29376900 |
| C | 0.79775600  | 16.05984300 | 17.39485100 |
| H | -0.26468100 | 16.24950800 | 17.28833100 |
| C | 5.84129200  | 15.91967300 | 10.85830200 |
| H | 6.24673700  | 15.19059500 | 10.16529700 |
| C | 2.63165400  | 14.98888400 | 13.64656100 |
| C | 4.79400100  | 17.77611000 | 12.64638800 |
| H | 6.69570800  | 15.59736000 | 14.99972400 |
| C | 3.52864400  | 15.61090200 | 17.66008700 |
| H | 4.59430200  | 15.44731300 | 17.77330700 |
| C | 2.67569000  | 15.36686900 | 18.73337500 |
| H | 3.08319400  | 15.00867700 | 19.67236500 |
| C | 1.64926200  | 16.29195400 | 16.31905900 |
| H | 1.24376300  | 16.65893800 | 15.38405200 |
| C | 2.48718500  | 13.75878000 | 14.30383600 |
| H | 3.16400800  | 13.50550600 | 15.11105400 |
| C | 1.75722700  | 15.28389100 | 12.58961100 |
| H | 1.86774600  | 16.21985700 | 12.05355800 |
| C | 1.48963700  | 12.86195400 | 13.93018500 |
| C | 6.08081900  | 17.27913800 | 10.66220800 |
| C | 0.61208000  | 13.17880600 | 12.89444900 |
| C | 0.74956400  | 14.39501700 | 12.22591000 |
| H | 0.07558000  | 14.64889300 | 11.41510400 |
| C | 5.54795200  | 18.20554900 | 11.55758500 |
| H | 5.71682200  | 19.26617800 | 11.40737900 |
| H | 6.67046000  | 17.61367300 | 9.81609200  |
| H | -0.16661200 | 12.48176800 | 12.60579100 |
| H | 0.64168700  | 15.40785500 | 19.44316700 |
| H | 1.39930600  | 11.91359900 | 14.44835800 |
| C | 6.59573800  | 18.75940800 | 16.58676400 |
| C | 5.26734300  | 18.34733100 | 16.33090600 |
| C | 4.21756900  | 19.20864500 | 16.69694600 |
| C | 4.50300500  | 20.42381500 | 17.30003400 |
| C | 5.83015200  | 20.81062300 | 17.54980100 |
| C | 6.88620400  | 19.98331200 | 17.19402200 |
| C | 6.45446100  | 16.53920100 | 15.46905100 |
| C | 5.21003000  | 17.05537000 | 15.66989700 |
| H | 3.19053100  | 18.91652900 | 16.51500300 |

|   |            |             |             |
|---|------------|-------------|-------------|
| H | 3.69208300 | 21.08438200 | 17.58504500 |
| H | 6.03334900 | 21.76442900 | 18.02313300 |
| H | 7.91135800 | 20.28171800 | 17.38057500 |
| H | 4.38212900 | 18.50411300 | 13.33520700 |
| S | 7.75090800 | 17.55899500 | 16.03369200 |

***E*-Product of Photocyclization of 3-TPVBT in gas**

|   |             |             |             |
|---|-------------|-------------|-------------|
| C | 3.81841300  | 15.88095200 | 13.92612400 |
| C | 4.58209400  | 16.30442000 | 12.87104600 |
| C | 2.86913000  | 16.29140800 | 16.25510500 |
| C | 4.45027200  | 15.77503700 | 11.53181400 |
| H | 3.65710900  | 15.06424100 | 11.33633200 |
| C | 0.79874700  | 15.94282300 | 18.12103000 |
| C | 3.96485400  | 16.49530300 | 15.25524800 |
| C | 0.89761000  | 17.13011900 | 17.39756900 |
| H | 0.17624700  | 17.92452300 | 17.55453900 |
| C | 5.30984200  | 16.11755800 | 10.54234700 |
| H | 5.18996200  | 15.69464500 | 9.55123500  |
| C | 2.79849700  | 14.80017600 | 13.73140000 |
| C | 5.54647500  | 17.46978700 | 13.07806700 |
| H | 6.82526100  | 16.50854800 | 14.52005300 |
| C | 2.75737700  | 15.10111500 | 16.98291500 |
| H | 3.47964200  | 14.30861400 | 16.82462700 |
| C | 1.73216800  | 14.92869600 | 17.91075100 |
| H | 1.66210000  | 14.00123700 | 18.46828300 |
| C | 1.92452100  | 17.30157400 | 16.47114800 |
| H | 2.00328400  | 18.22931800 | 15.91511700 |
| C | 3.19102700  | 13.45631100 | 13.72019100 |
| H | 4.23810400  | 13.20909500 | 13.85847900 |
| C | 1.44422900  | 15.10222000 | 13.54520400 |
| H | 1.12341000  | 16.13763100 | 13.54935700 |
| C | 2.25542500  | 12.44015800 | 13.53078900 |
| C | 6.43370300  | 17.00308600 | 10.79598800 |
| C | 0.91004000  | 12.75359800 | 13.34798700 |
| C | 0.50790000  | 14.08839600 | 13.35389000 |
| H | -0.53648500 | 14.34193500 | 13.20908500 |
| C | 6.57827300  | 17.60617300 | 11.98499000 |
| H | 7.41719200  | 18.26951100 | 12.16924100 |
| H | 7.16405400  | 17.16021000 | 10.00945600 |
| H | 0.18100000  | 11.96473600 | 13.20032000 |
| H | -0.00008300 | 15.80789100 | 18.84162200 |

|   |            |             |             |
|---|------------|-------------|-------------|
| H | 2.57886000 | 11.40497800 | 13.52469500 |
| C | 6.57731700 | 18.77200300 | 16.60220100 |
| C | 5.48484900 | 17.89420500 | 16.78561500 |
| C | 4.95657100 | 17.76632000 | 18.08087000 |
| C | 5.49340200 | 18.49700400 | 19.13612100 |
| C | 6.56613500 | 19.36657000 | 18.92630600 |
| C | 7.11929700 | 19.50334800 | 17.65562300 |
| C | 6.14682900 | 17.37396800 | 14.47053200 |
| C | 5.07856300 | 17.22899200 | 15.54436300 |
| H | 4.13303000 | 17.09329500 | 18.26759300 |
| H | 5.07652200 | 18.38293600 | 20.13004200 |
| H | 6.97871600 | 19.93141500 | 19.75468700 |
| H | 7.96047000 | 20.16596700 | 17.48863300 |
| H | 4.93716000 | 18.39677600 | 13.06219500 |
| S | 7.15797700 | 18.85678600 | 14.93269000 |

**Z-Product of Photocyclization of 3-TPVBT in gas**

|   |             |             |             |
|---|-------------|-------------|-------------|
| C | 3.65970700  | 16.12053700 | 13.83350100 |
| C | 4.50795900  | 16.45197200 | 12.80941700 |
| C | 2.73765500  | 16.44748500 | 16.19470700 |
| C | 4.63721800  | 15.68712300 | 11.59445900 |
| H | 3.97875100  | 14.84101800 | 11.44444200 |
| C | 0.94257700  | 15.73538400 | 18.23324600 |
| C | 3.69068700  | 16.84799500 | 15.11026100 |
| C | 0.68177000  | 16.84084300 | 17.42585800 |
| H | -0.21530100 | 17.42994600 | 17.58203900 |
| C | 5.59428800  | 15.96686500 | 10.67259000 |
| H | 5.68046500  | 15.35289500 | 9.78314700  |
| C | 2.75241500  | 14.93487800 | 13.70743200 |
| C | 5.27602300  | 17.76115200 | 12.88391000 |
| H | 5.67491400  | 19.30006100 | 14.30585100 |
| C | 2.98836800  | 15.33833800 | 17.00951600 |
| H | 3.88794700  | 14.75413100 | 16.85430900 |
| C | 2.09934100  | 14.98647300 | 18.02248700 |
| H | 2.31118900  | 14.12659900 | 18.64826100 |
| C | 1.57515300  | 17.19424100 | 16.41540200 |
| H | 1.37259000  | 18.05873200 | 15.79205400 |
| C | 3.25688900  | 13.63401200 | 13.82546300 |
| H | 4.31362200  | 13.49104200 | 14.02328300 |
| C | 1.38586000  | 15.10021500 | 13.45253300 |
| H | 0.97825700  | 16.10027600 | 13.35615100 |

|   |             |             |             |
|---|-------------|-------------|-------------|
| C | 2.41936000  | 12.52794600 | 13.69002400 |
| C | 6.54684900  | 17.04037200 | 10.87535800 |
| C | 1.06129000  | 12.70565600 | 13.43382000 |
| C | 0.54740000  | 13.99608400 | 13.31457400 |
| H | -0.50765100 | 14.14436000 | 13.11223900 |
| C | 6.42866700  | 17.87330400 | 11.92210000 |
| H | 7.13076800  | 18.68621300 | 12.07481400 |
| H | 7.36183100  | 17.15913300 | 10.16948500 |
| H | 0.40859400  | 11.84646300 | 13.32750900 |
| H | 0.24989400  | 15.45916800 | 19.02030500 |
| H | 2.82911200  | 11.52826500 | 13.78464200 |
| C | 6.64728900  | 18.12571500 | 16.63642300 |
| C | 5.23231000  | 18.13738700 | 16.68015900 |
| C | 4.59812300  | 18.41989500 | 17.89166000 |
| C | 5.35804900  | 18.67476200 | 19.03403200 |
| C | 6.75082200  | 18.63746900 | 18.97969500 |
| C | 7.40524900  | 18.36268700 | 17.77736100 |
| C | 5.62667200  | 18.20836100 | 14.30701600 |
| C | 4.67163200  | 17.76093900 | 15.36757400 |
| H | 3.51793100  | 18.44702900 | 17.94496900 |
| H | 4.85883000  | 18.90385100 | 19.96843200 |
| H | 7.33403400  | 18.83329400 | 19.87255900 |
| H | 8.48800200  | 18.34308600 | 17.73236800 |
| H | 4.53837600  | 18.52272500 | 12.56397600 |
| S | 7.31559500  | 17.74408100 | 15.02409600 |

## 7. References

(1) Frisch, M. J.; Trucks, G. W.; Schlegel, H. B.; Scuseria, G. E.; Robb, M. A.; Cheeseman, J. R.; Scalmani, G.; Barone, V.; Mennucci, B.; Petersson, G. A.; Nakatsuji, H.; Caricato, M.; Li, X.; Hratchian, H. P.; Izmaylov, A. F.; Bloino, J.; Zheng, G.; Sonnenberg, J. L.; Hada, M.; Ehara, M.; Toyota, K.; Fukuda, R.; Hasegawa, J.; Ishida, M.; Nakajima, T.; Honda, Y.; Kitao, O.; Nakai, H.; Vreven, T.; Montgomery, J. A., Jr.; Peralta, J. E.; Ogliaro, F.; Bearpark, M.; Heyd, J. J.; Borthers, E.; Kudin, K. N.; Staroverov, V. N.; Kobayashi, R.; Normand, J.; Rahavachari, K.; Rendell, A.; Burant, J. C.; Iyengar, S. S.; Tomasi, J.; Cossi, M.; Rega, N.; Millam, J. M.; Klene, M.; Knox, J. E.; Cross, J. B.; Bakken, V.; Adamo, C.; Jaramillo, G.; Gomperts, R.; Stratmann, R. E.; Yazyev, O.; Austin, A. J.; Cammi, R.; Pomelli, C.; Ochterski, J. W.; Martin, R. L.; Morokuma, K.; Zakrzewski, V. G.; Voth, G. A.; Salvador, P.; Dannenberg, J. J.; Dapprich, S.; Daniels, A. D.; Farkas, O.; Foresman, J. B.; Ortiz, J. V.; Cioslowski, J.; Fox, D. J. Gaussian, Inc. Wallingford CT, 2009.

(2) Becke, A. D. Density-functional thermochemistry. III. The role of exact exchange. *J. Chem. Phys.* **1993**, *98*, 5648–5652.

(3) Adamo, C.; Jacquemin, D. The calculations of excited-state properties with time-dependent density functional theory. *Chem. Soc. Rev.* **2013**, *42*, 845–856.
